# Supplementary material for: The AvrPm3-Pm3 effector-NLR interactions control both race-specific resistance and host-specificity of cereal mildews on wheat
Source: PubMed Central journal article supplement (PMC6533294; doi:10.1038/s41467-019-10274-1), 2019-05-23
Supplement: 41467_2019_10274_MOESM1_ESM.pdf [file 41467_2019_10274_MOESM1_ESM.pdf]

1  
2  
3  
4  
5  
6

**Supplementary Information**

**The *AvrPm3-Pm3* effector-NLR interactions control both race-specific resistance and host-specificity of cereal mildews on wheat.**

Bourras, Kunz, Xue et al. (2019)

7 **Supplementary Figures**

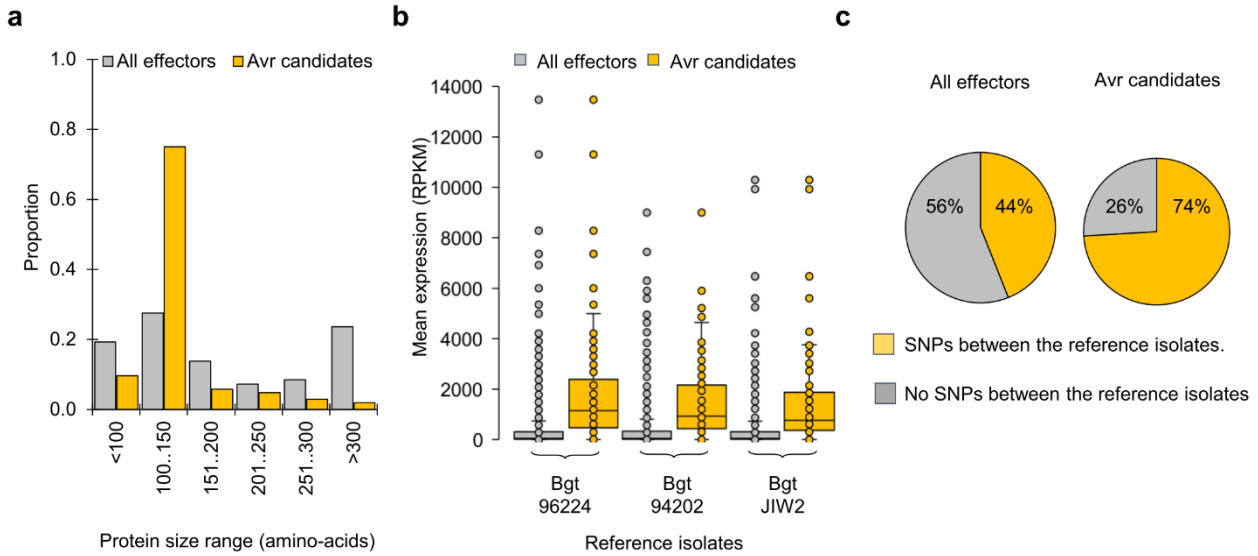

8

9

10 **Supplementary Figure 1.** Assessment of *Avr* gene features in the subset of 100 candidates selected by effector  
 11 benchmarking. Candidate *Avrs* were characterized for the size of the encoded protein (**a**), gene expression  
 12 levels in the reference mildew isolate Bgt\_96224, Bgt\_94202 and Bgt\_JIW2 (**b**), and single nucleotide  
 13 polymorphisms (SNPs) among the three mildew reference isolates Bgt\_96224, Bgt\_94202 and Bgt\_JIW2 (**c**).  
 14 In (**b**), gene expression values are given as Reads Per Kilobase Million (RPKM). Mean values are indicated  
 15 by the middle line in the boxplot. Individual data points are plotted along the whisker lines. Data points outside  
 16 the whisker boundaries represent outliers outside the inner quartile range. In (**c**) synonymous and non-  
 17 synonymous SNP mutations were not distinguished (Supplementary Note 1). Source data is provided in  
 18 Supplementary Data 1.

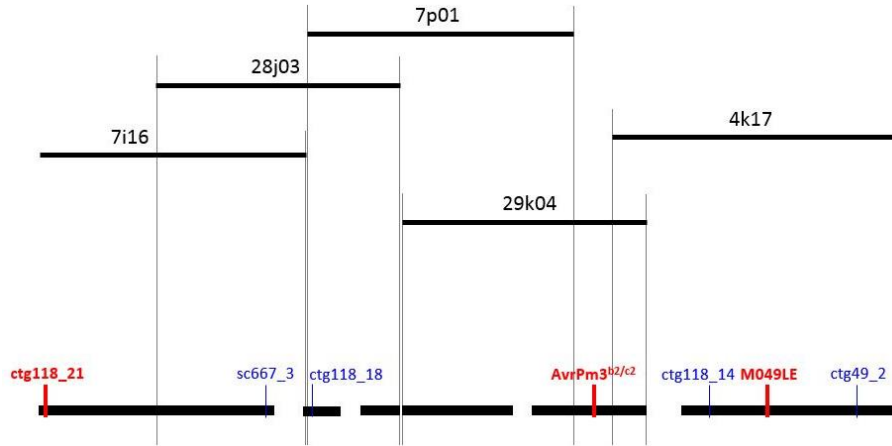

20

21 **Supplementary Figure 2.** Bacterial artificial chromosome (BAC) clones spanning the *AvrPm3*<sup>b2/c2</sup> genetic  
 22 *Locus\_3*. The minimal tiling path used to reconstruct *Locus\_3* consists of five BACs spanning a physical  
 23 interval of 371kb. BAC identifiers are indicated in black, genetic markers in this region are depicted in blue.  
 24 The position of the *Locus\_3* flanking markers ctg118\_21 and M049LE as well as the position of *AvrPm3*<sup>b2/c2</sup>  
 25 (*BgtE-20002*) are marked in red. Marker M049LE has previously been described <sup>1</sup>. Additional marker  
 26 information can be found in Supplementary Table 3.

27

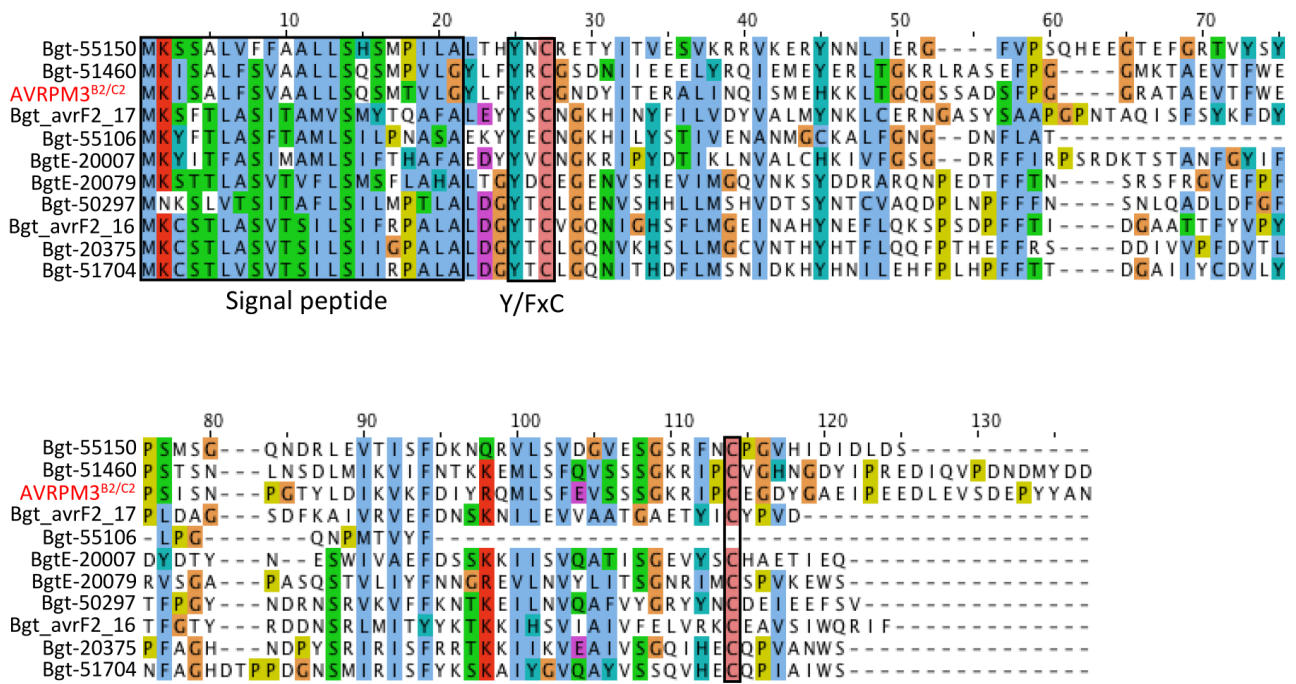

28

29

30 **Supplementary Figure 3.** Protein sequence alignments of the effector gene family E018 members found in  
 31 the reference isolate Bgt\_96224. AVRPM3<sup>B2/C2</sup> is highlighted (red). The N-terminal predicted signal peptide,  
 32 the conserved Y/FxC motif and C-terminal cysteine are indicated (black boxes). Conserved amino acids are  
 33 colored based on biochemical or physical properties (ClustalX color scheme: blue: hydrophobic; red:  
 34 positively charged; purple: negatively charged; green: polar uncharged; yellow: proline; pink: cysteine; orange:  
 35 glycine).

36

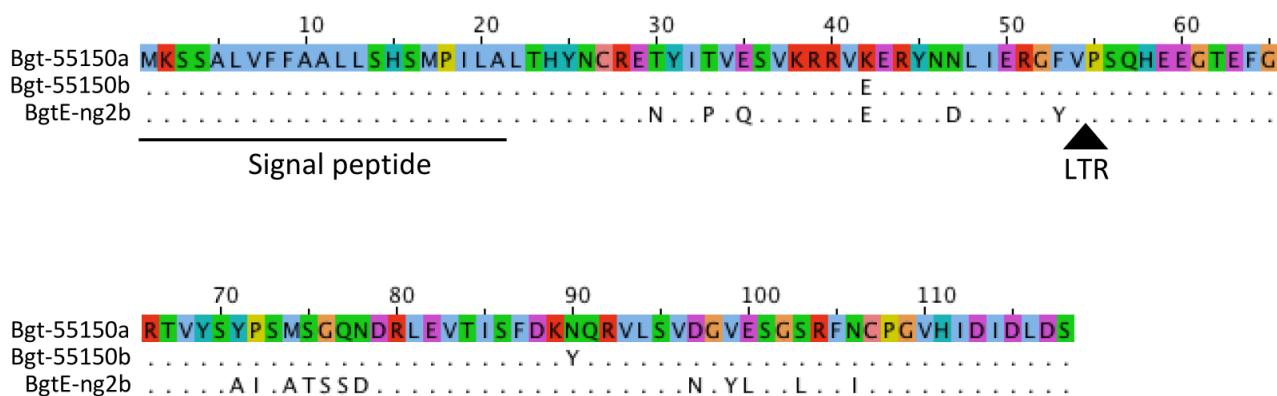

37

38 **Supplementary Figure 4.** Protein sequence alignment of the AVR candidates from *Locus\_3* exhibiting  
 39 polymorphisms between the reference isolates Bgt\_96224 and Bgt\_94202. The sequence of Bgt-55150a  
 40 originating from Bgt\_96224 is shown as a reference, for Bgt-55150b and BgtE-ng2b, both found in Bgt\_94202,  
 41 only polymorphic residues are indicated whereas identical residues are represented by dots. BgtE-ng2 is found  
 42 to be disrupted by the insertion of a partial LTR-retrotransposon sequence (607bp) in Bgt\_96224, the insertion  
 43 site is indicated by a black triangle. The extent of the N-terminal predicted signal peptide is highlighted by a  
 44 black line. Coloring of the amino acids is based on biochemical or physical properties (ClustalX color scheme:  
 45 blue: hydrophobic; red: positively charged; purple: negatively charged; green: polar uncharged; yellow:  
 46 proline; pink: cysteine; orange: glycine).

47

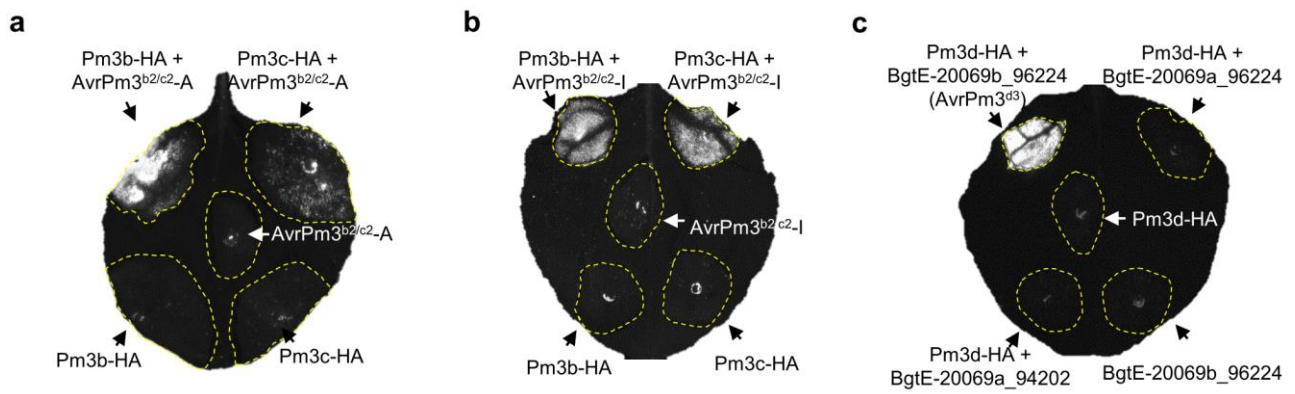

48

49 **Supplementary Figure 5.** *AvrPm3<sup>b2/c2</sup>* and *AvrPm3<sup>d3</sup>* functional validation assays: auto-activity controls.

50 **(a-b)** R gene auto-activity controls for *Pm3b* and *Pm3c* in set-ups where these were individually expressed or  
 51 combined with **(a)** *AvrPm3<sup>b2/c2</sup>-A*, or **(b)** *AvrPm3<sup>b2/c2</sup>-I*. **(c)** NLR auto-activity controls for *Pm3d* in a set-up  
 52 where it is individually expressed or combined with BgtE-20069b\_96224, BgtE20069a\_96224, and  
 53 BgtE\_20069a\_94202. HR was assessed using HSR imaging 5 days after *Agrobacterium* infiltration. Results  
 54 were consistent over at least two independent assays of 6 to 8 independent leaf replicates.

55

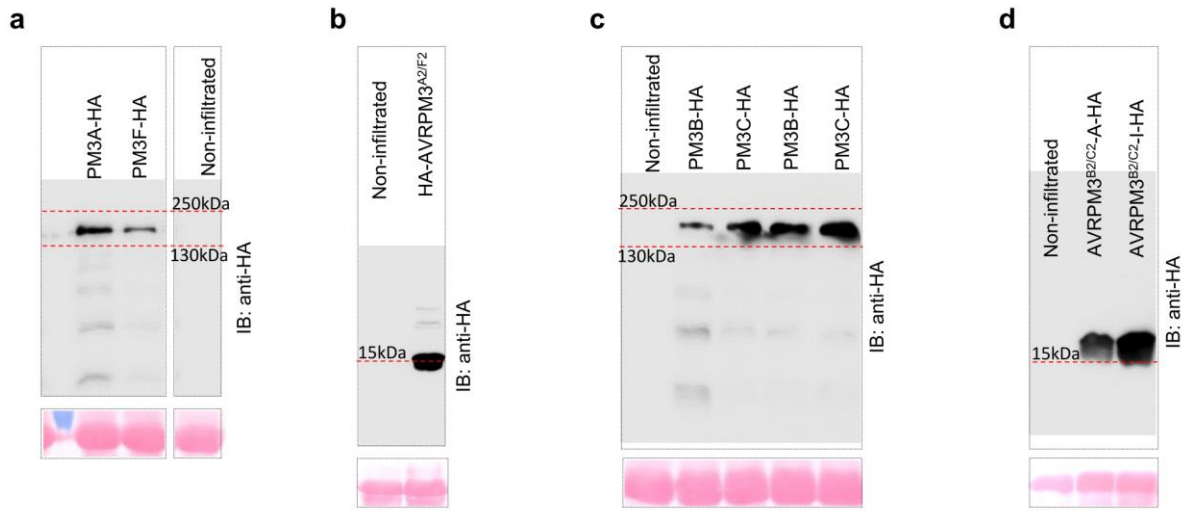

56

57

58 **Supplementary Figure 6.** Western blot detection of AVRPM3 and PM3 proteins.

59 **(a-d)** Western blot detection of epitope tagged NLR and AVR proteins from Fig. 2d-f. **(a)** Western blot  
 60 detection of PM3A-HA and PM3F-HA from Fig. 2d. **(b)** Western blot detection of HA-AVRPM3<sup>A2/F2</sup> from  
 61 Fig. 2d. **(c)** Western blot detection of PM3B-HA and PM3C-HA from Fig. 2e (two first bands to the left) and  
 62 Fig. 2f (two last bands to the right). **(d)** Western blot detection of AVRPM3<sup>B2/C2</sup>-A-HA from Fig. 2e and  
 63 AVRPM3<sup>B2/C2</sup>-I-HA from Fig. 2f. Ponceau staining of the Western blot membrane is depicted in the lower  
 64 panels from a-d. Uncropped Western blot images are provided in a Source Data File.

65

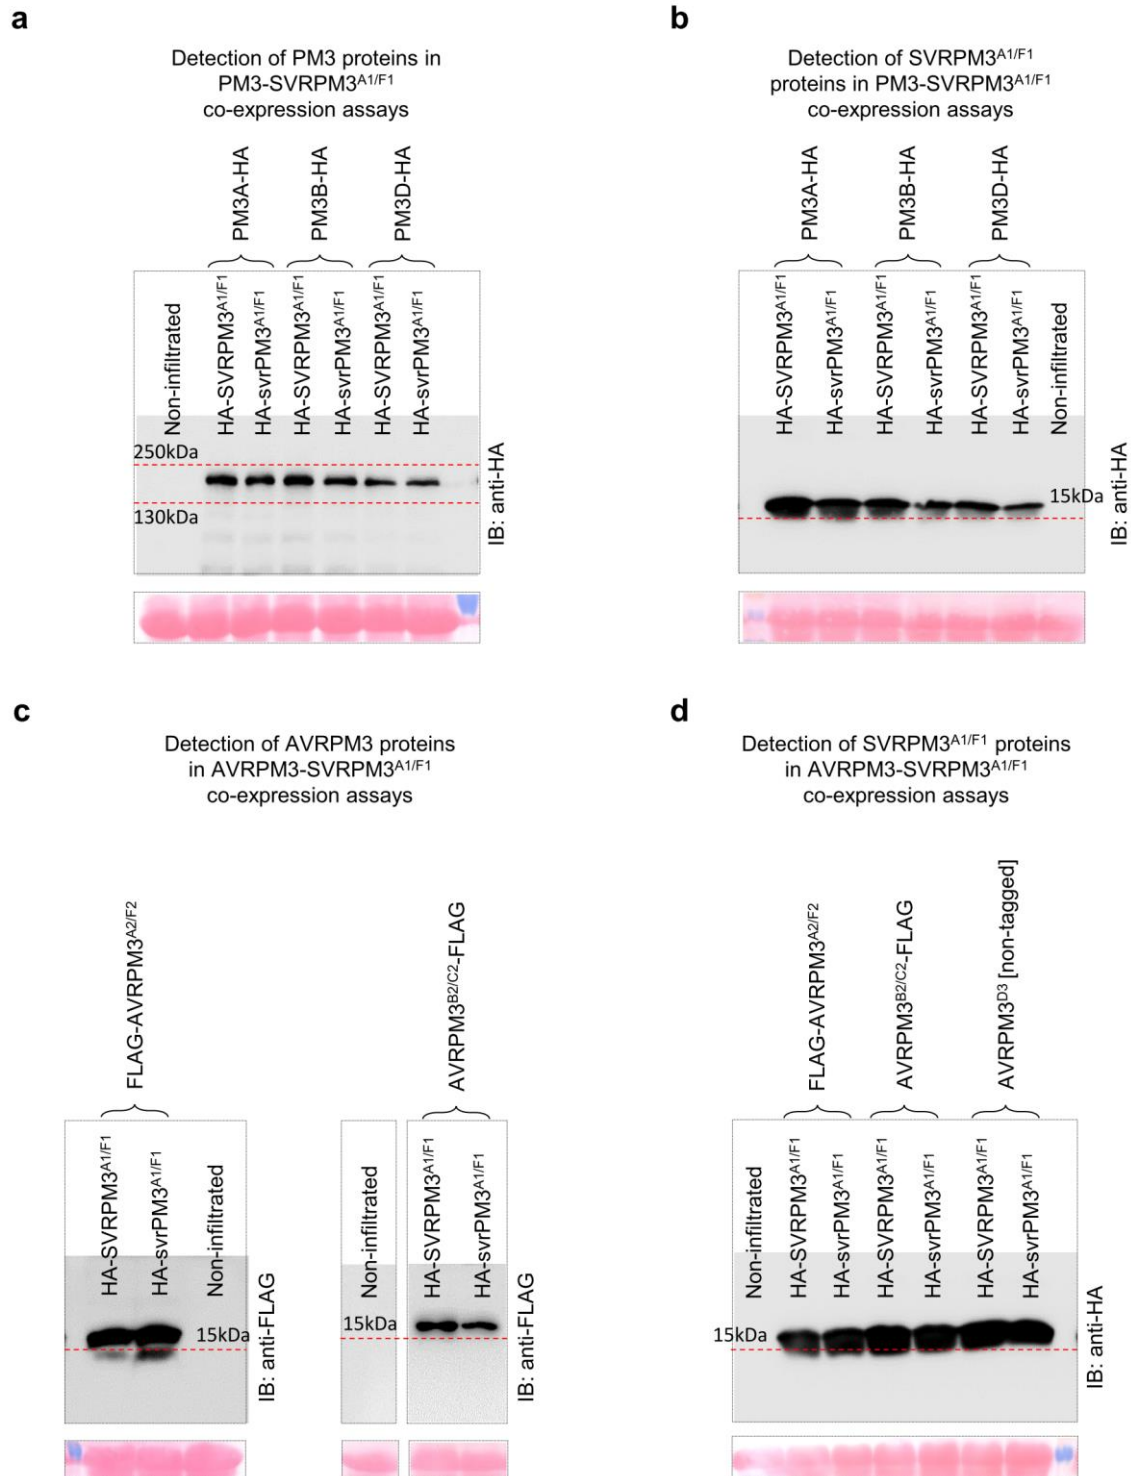

66

67

68 **Supplementary Figure 7.** Assessment of the effect of SVRPM3<sup>A1/F1</sup> expression in *Nicotiana benthamiana* on  
 69 PM3 and AVRPM3 protein levels.

70 **(a)** Western blot detection of HA epitope tagged fusion of the PM3A, PM3B, and PM3D proteins in presence  
 71 of the active HA-SVRPM3<sup>A1/F1</sup> or the inactive HA-svrPM3<sup>A1/F1</sup> variants. **(b)** Western blot detection of HA-  
 72 SVRPM3<sup>A1/F1</sup> and HA-svrPM3<sup>A1/F1</sup> from the same samples as in (a). Based on (a) and (b) we conclude that the  
 73 mode of action of SVRPM3<sup>A1/F1</sup> is not based on suppression of PM3 protein expression. **(c)** Western blot  
 74 detection of FLAG-AVRPM3<sup>A2/F2</sup> and AVRPM3<sup>B2/C2</sup>-FLAG in presence of the active HA-SVRPM3<sup>A1/F1</sup> and



75 the inactive HA-svrPM3<sup>A1/F1</sup> variants. **(d)** Western blot detection of HA-SVRPM3<sup>A1/F1</sup> and HA-svrPM3<sup>A1/F1</sup>  
76 from the same samples in (c) (first 4 bands from the left) and from one additional sample where both SVR  
77 variants were co-expressed with non-tagged AVRPM3<sup>D3</sup> (last 2 bands on the right). Based on (c) and (d) we  
78 conclude that the mode of action of SVRPM3<sup>A1/F1</sup> is not based on suppression of AVRPM3 protein expression.  
79 Uncropped Western blot images are provided in a Source Data File.

80

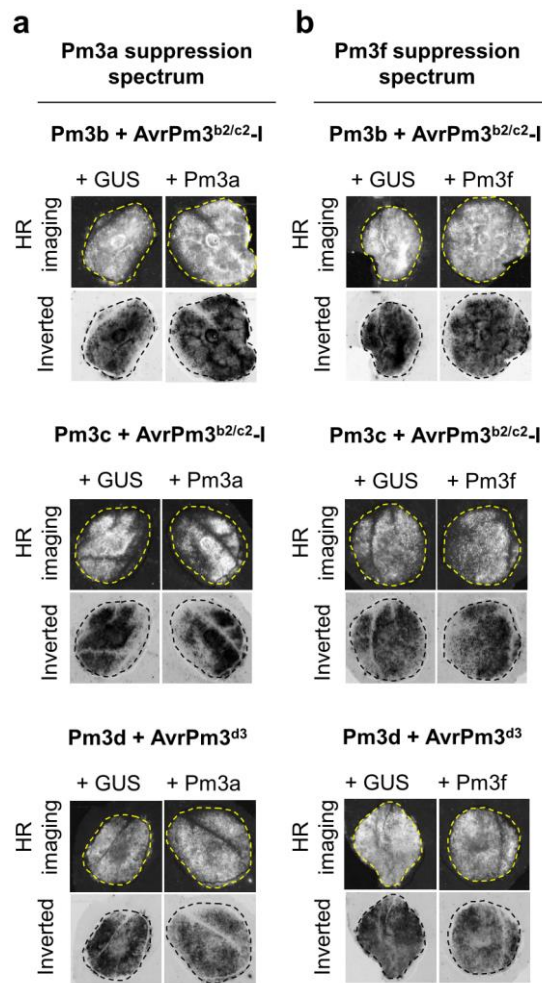

81

82

83 **Supplementary Figure 8.** *Pm3a* and *Pm3f* show no suppression activity towards *Pm3b*, *Pm3c* and *Pm3d*.

84 The suppression spectra of *Pm3a* (a) and *Pm3f* (b) were assessed for every *AvrPm3*-*Pm3* pair in presence of  
 85 other *Pm3* alleles as compared to a control where *Pm3a* and *Pm3f* are replaced by GUS. HR was assessed  
 86 using HSR imaging 5 days after agrobacterium infiltration. Results are consistent over at least two independent  
 87 assays of 6 to 8 independent leaf replicates each. Complete *N. benthamiana* leaf pictures are provided in a  
 88 Source Data File.

89

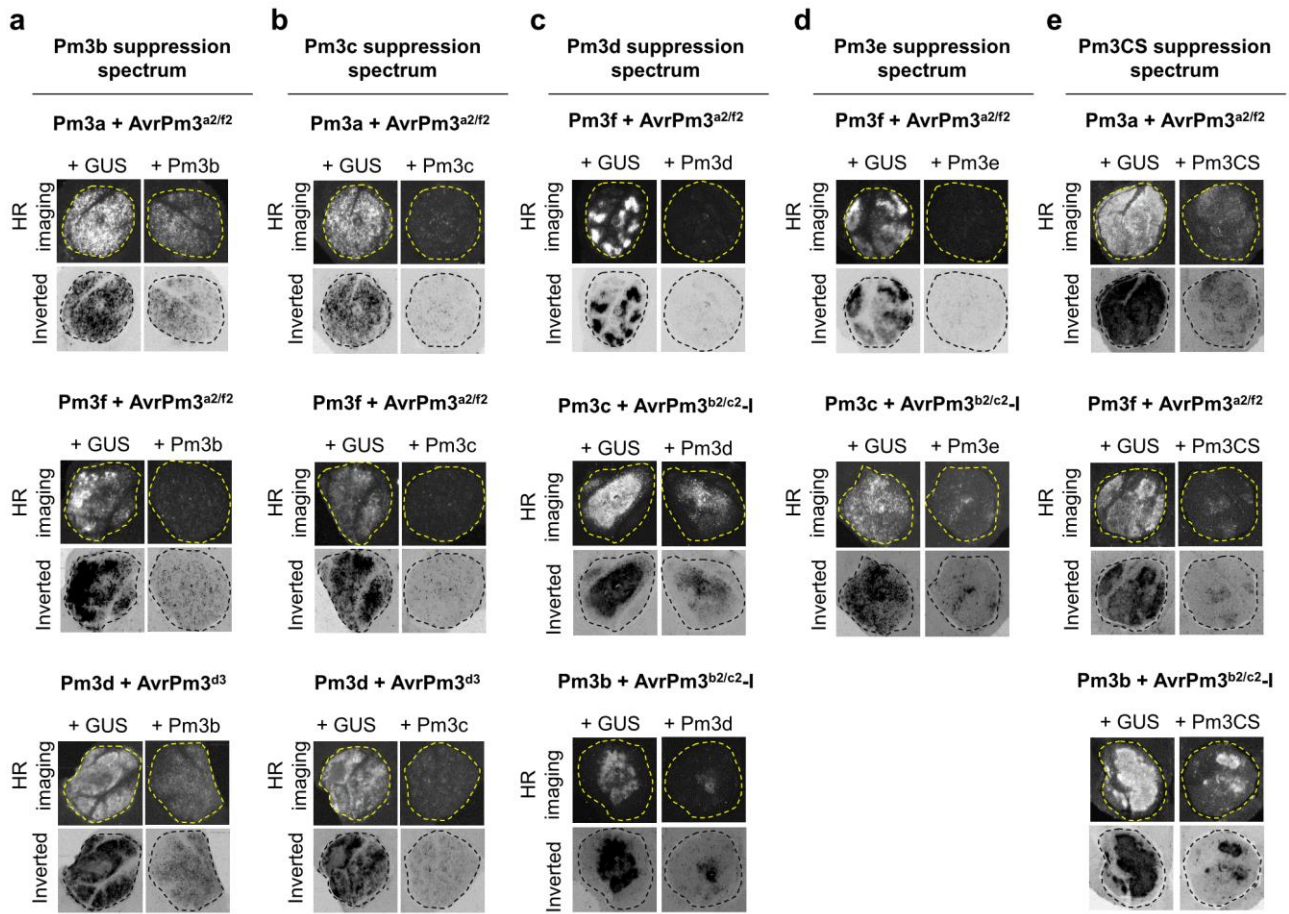

90

91

92 **Supplementary Figure 9.** Suppression of *AvrPm3-Pm3* recognition by *Pm3* NLR interactions.

93 The suppression spectra of *Pm3b* (a), *Pm3c* (b), *Pm3d* (c), and *Pm3e* (d) and *Pm3CS* (e) are depicted.

94 Suppression is assessed for every *AvrPm3-Pm3* pair in presence of other *Pm3* alleles as compared to a control

95 where the suppressor NLR is replaced by GUS. HR was assessed using HSR imaging 5 days after

96 agrobacterium infiltration. Results are consistent over at least two independent assays of 6 to 8 independent

97 leaf replicates each. Complete *N. benthamiana* leaf pictures are provided in a Source Data File.

98

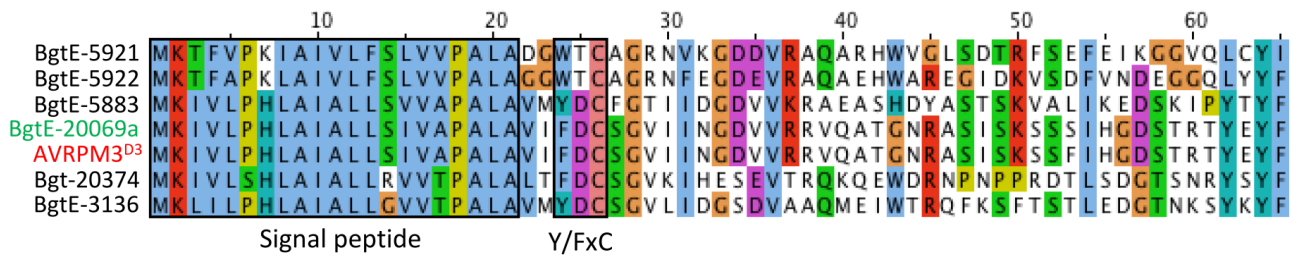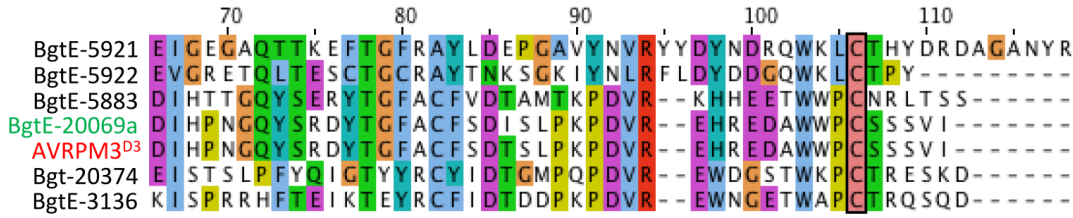

99

100 **Supplementary Figure 10.** Protein sequence alignments of the effector gene family E034 members found in  
 101 the reference isolate Bgt\_96224.

102 AVRPM3<sup>D3</sup> (red) and its duplication BgtE-20069a (green) are highlighted. The N-terminal predicted signal  
 103 peptide, the conserved Y/FxC motif and C-terminal cysteine are indicated (black boxes). Conserved amino  
 104 acids are colored based on biochemical or physical properties (clustal x color scheme: blue, hydrophobic; red,  
 105 positively charged; purple, negatively charged; green, polar uncharged; yellow, proline; pink, cysteine; orange,  
 106 glycine).

107

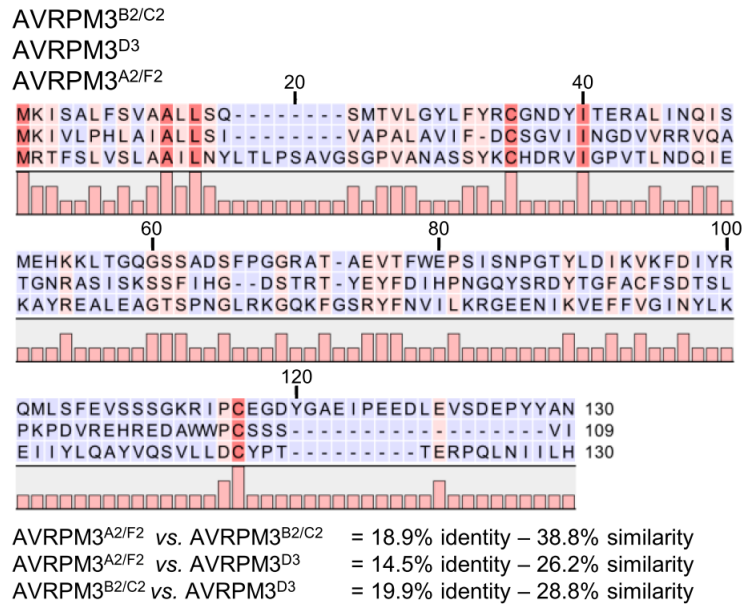

108

109 **Supplementary Figure 11.** Protein alignment of AVRPM3<sup>A2/F2</sup>, AVRPM3<sup>B2/C2</sup>, and AVRPM3<sup>D3</sup>.

110

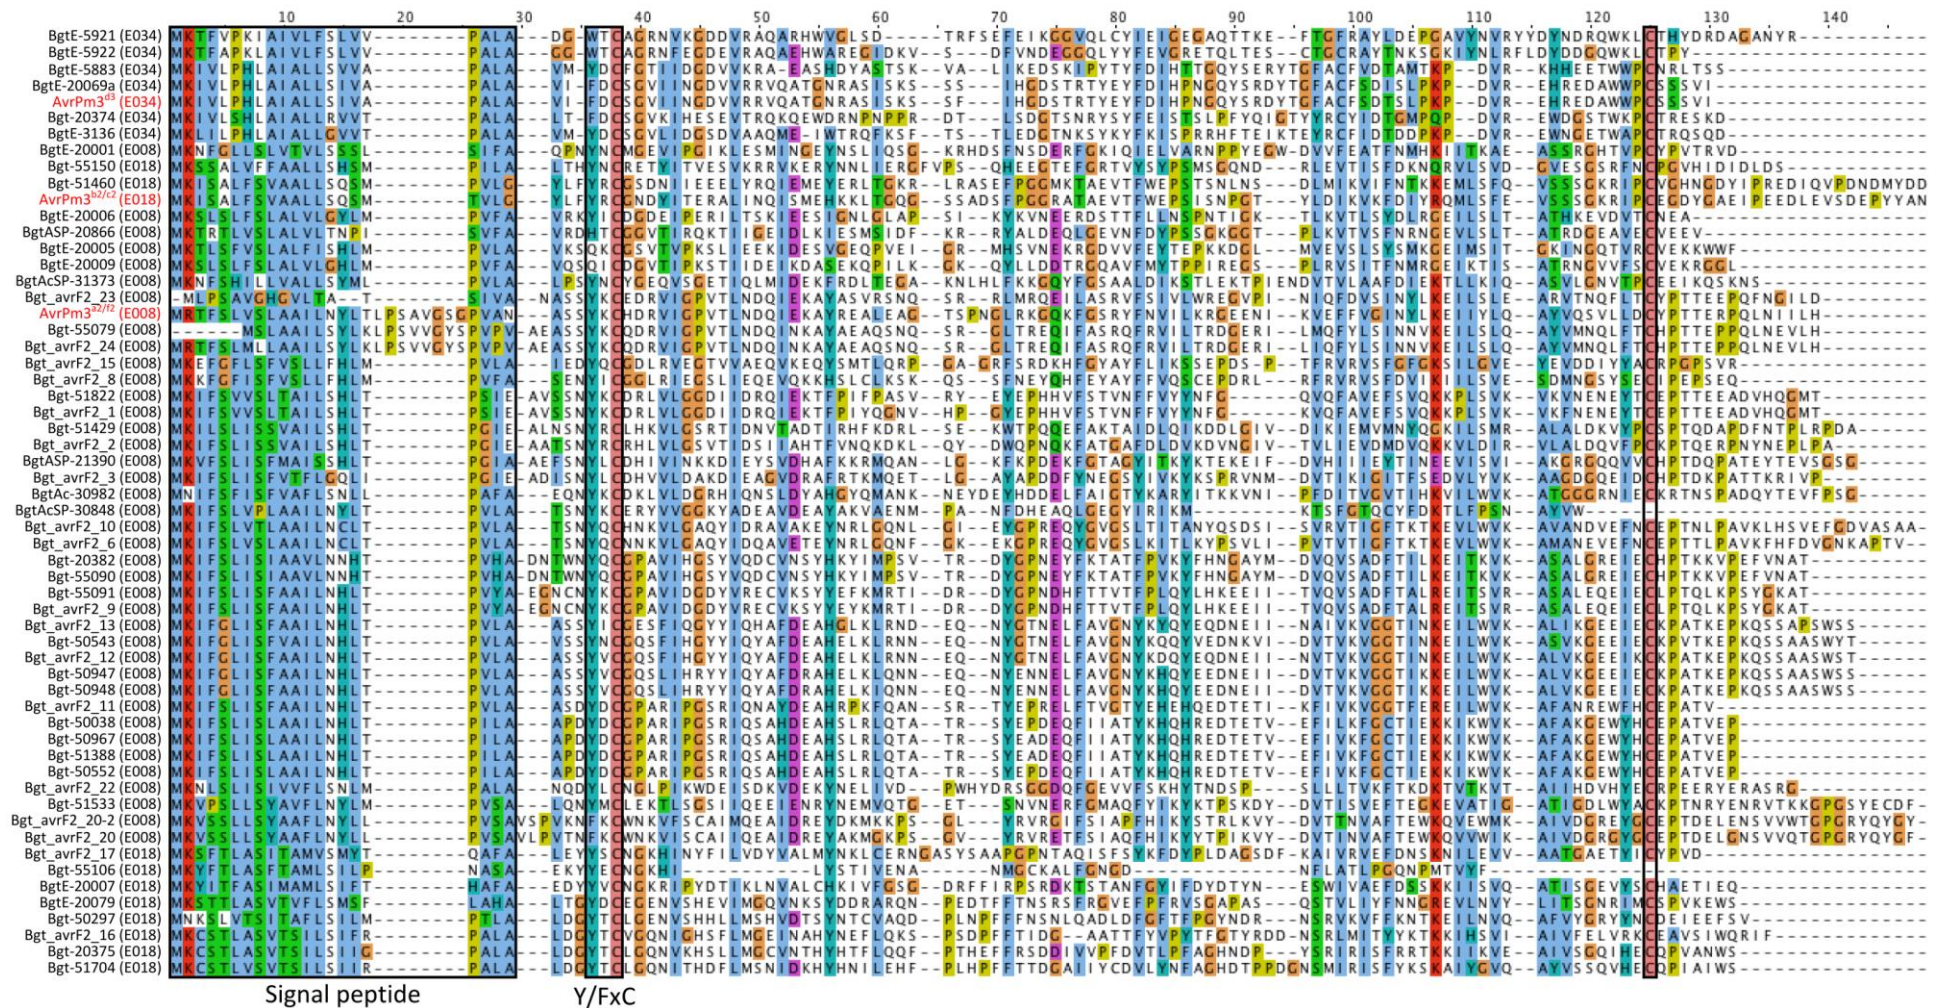

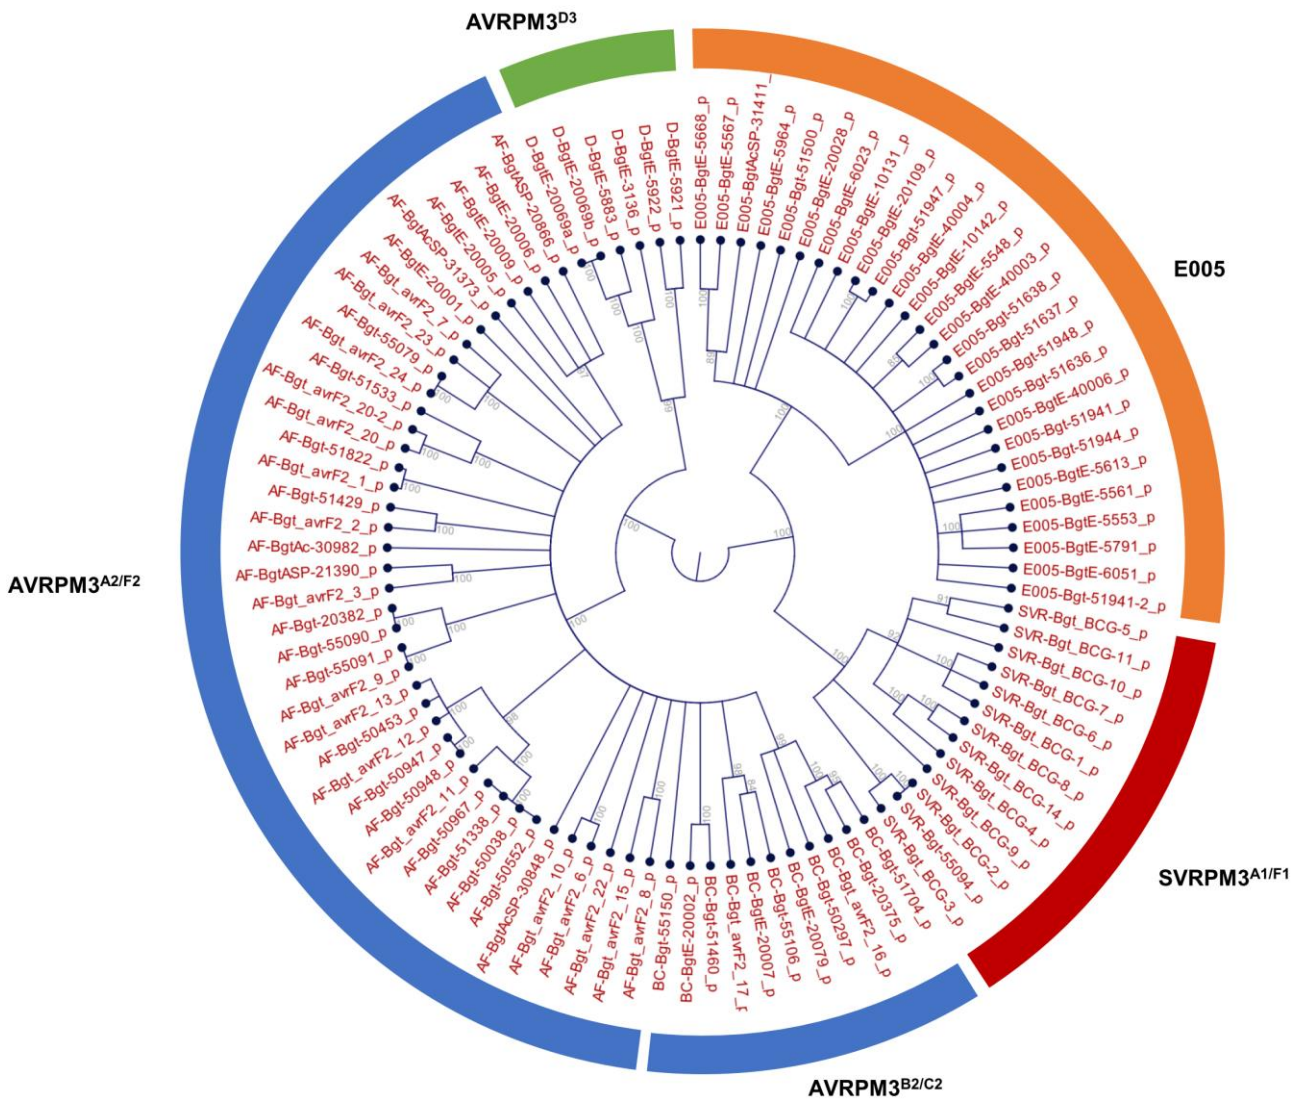

117

118 **Supplementary Figure 13.** High resolution depiction of the phylogenetic relationships among AVR and SVR  
 119 effector protein families in *B. g. tritici*.

120 The effector families of AVRPM3<sup>A2/F2</sup> and AVRPM3<sup>B2/C2</sup> (blue segment), AVRPM3<sup>D3</sup> (green segment) are  
 121 indicated. The SVRPM3<sup>A1/F1</sup> (red segment) and E005 (orange segment) were used as outgroups. Wheat  
 122 powdery mildew effector gene families were previously defined based on BLAST analysis <sup>2</sup>. The depicted  
 123 phylogenetic analysis suggests the AVRPM3<sup>A2/F2</sup> and AVRPM3<sup>B2/C2</sup> families are not phylogenetically  
 124 separate, but form one contiguous group of effectors that have probably evolved from a common ancestor.  
 125 Only branches with a minimum bootstrap value of ‘80’ are depicted (see Methods).

126

a

**AVRPM3<sup>A2/F2</sup>**

AA\_QUERY GPVANASSYKCHDRVIGPVTLNDQIEKAYREAL EAGTSPNGLRKGQKFGSRYFNVLKRGEENIKVEFFVGINYLKEI IYLQAYVQSVLLDCYPTTERPQLNIILH  
SS\_PSIPRED EE EEE HHHHHHHHHHHHHHHHHHHHH EEEEEEEEEEE EEEEEEEEEEE EEEEEEEEEEE EEEE EE  
SS\_SPIDER2 E HHHHHHHHHHHHHHHHHHHHH EEEEEEEEEEE EEEEEEEEEEE EEEEEEEEEEE EEEE EE HHHHHH  
SS\_PSSPRED EE EEE HHHHHHHHHHHHHHHHHHHHH EEEEEEEEEEE EEEEEEEEEEE EEEEEEEEEEE EEEEEEE  
SS\_DEEPCNF EEE EEE HHHHHHHHHHHHHHHHHHHHH EEEEEEEEEEE EEEEEEEEEEE EEEEEEEEEEE EEEEEEE

**AVRPM3<sup>B2/C2</sup>**

AA\_QUERY YLFYRCGNDYITERALINQISMEHKKLTGGSSADSFPGGGRATAEVTWFEPSSINPGTYLDIKVKFDIYRQMLSFEVSSSGKRIPCEGDYGA EIPEEDLEVSDEPYAN  
SS\_PSIPRED HHHHHHHHHHHHHHHHHHHHH EEEEEEE EEEEEEEEE EEEEEEEEE EEEEEEE E HHH  
SS\_SPIDER2 HHH HHHHHHHHHHHHHHHHHHHHH EEEEEEE EEEEEEEEE EEEEEEEEE EEEEE E HHH E  
SS\_PSSPRED EEEE HHHHHHHHHHHHHHHHHHHHH EEEEEEE EEEEEEEEE EEEEEEEEE EEEEE EE  
SS\_DEEPCNF EEEE E HHHHHHHHHHHHHHHHHHHHH EEEEEEEEEEE EEEEEEEEE EEEEEEE E

**AVRPM3<sup>D3</sup>**

AA\_QUERY VIFDCSGVIINGDVRRVQATGNRASISKSSF IHGDSRTTYEYFDIHPNGQYSRDYTGACFSDTSLPKPDVREHREDAWPCSSSVI  
SS\_PSIPRED EE EEEEE HHHHHHHHHH EEEEEEE EEEEEEEEE EEEEEEE EEE EEE  
SS\_SPIDER2 E EEE HHHHHHHH EEEEEEE EEEEEEEEE E EEEEE E E EEE  
SS\_PSSPRED EE EE HHHHHHHHHHHH EEEEEEE EEEEEEEEE EEEEEEE EEE EEE  
SS\_DEEPCNF EEE EE HHHHHHHHHH EEEEEEE EEEEEEEEE EEEEEEEEE EEE EEE

H =  $\alpha$ -helix E =  $\beta$ -strand

b

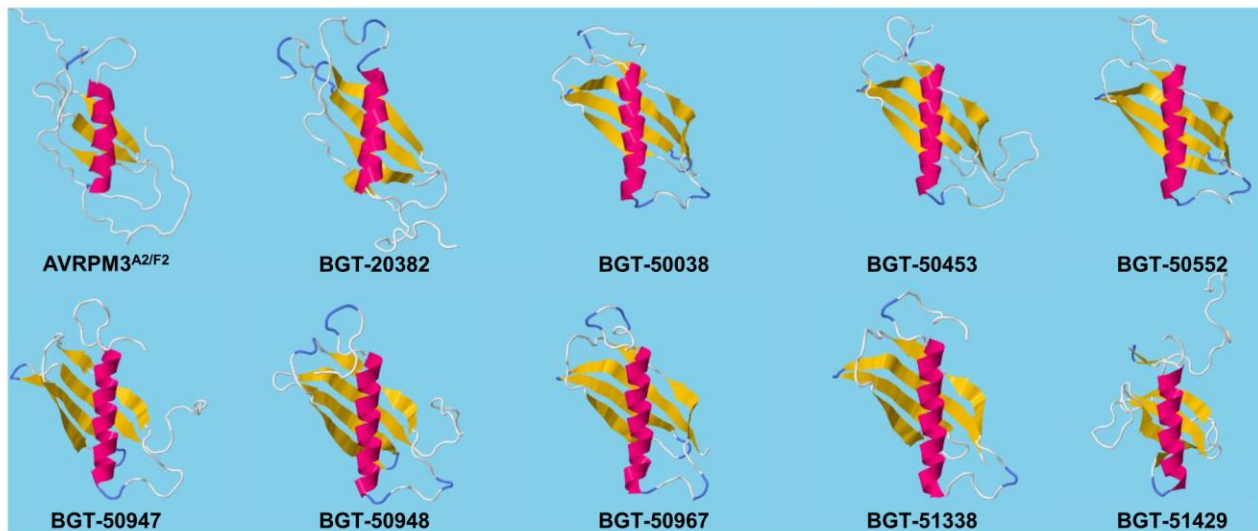

c

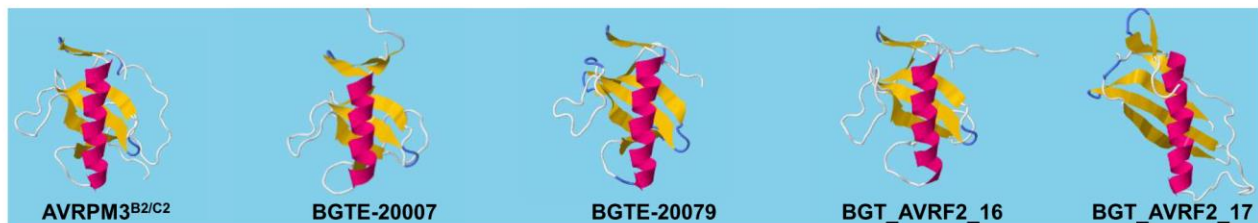

127

128

129 **Supplementary Figure 14.** *In silico* structural modelling of secondary and tertiary folds of the AVRPM3  
130 proteins.

131 (a) Secondary fold prediction for AVRPM3<sup>A2/F2</sup>, AVRPM3<sup>B2/C2</sup>, and AVRPM3<sup>D3</sup> using the Quick2D tool from  
132 the Max Planck Institute Bioinformatics Toolkit <sup>3</sup>. Output from four different secondary structure prediction



133 methods (i.e. PSIPRED, SPIDER2, PSSPred, and DEEPCNF) are depicted. Predicted secondary folds  
134 consistently consisted of one alpha helix (H) and at least 3 to 4 beta-strands (E). See  
135 (<https://toolkit.tuebingen.mpg.de/#/>) for detailed description of the prediction methods. **(b-c)** Selected  
136 examples of the best scored putative structures from RaptorX modelling for **(b)** AVRPM3<sup>A2/F2</sup> and 9 out of 39  
137 members of the AVRPM3<sup>A2/F2</sup> family, and **(c)** AVRPM3<sup>B2/C2</sup> and 4 out of 10 members of the AVRPM3B2/C2  
138 family. Full list of predicted structures can be found in Supplementary Data 5.

**a**

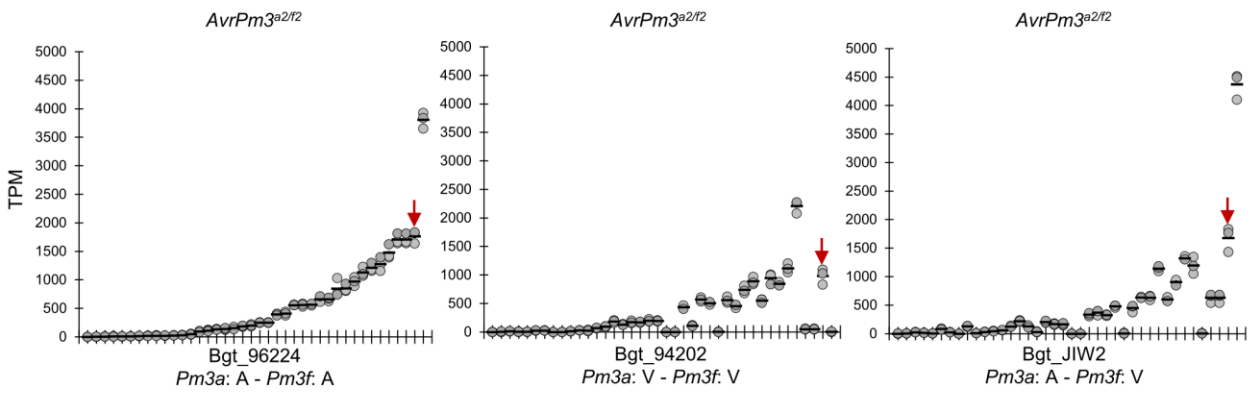

**b**

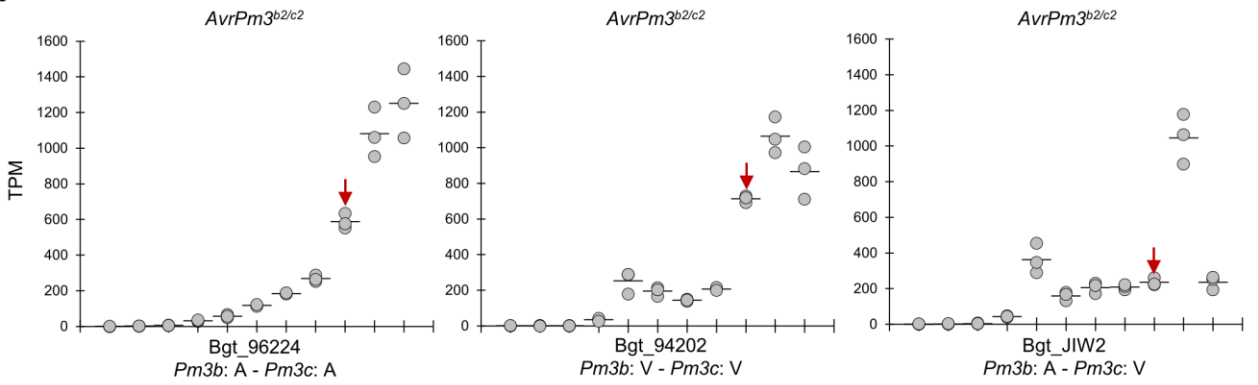

**c**

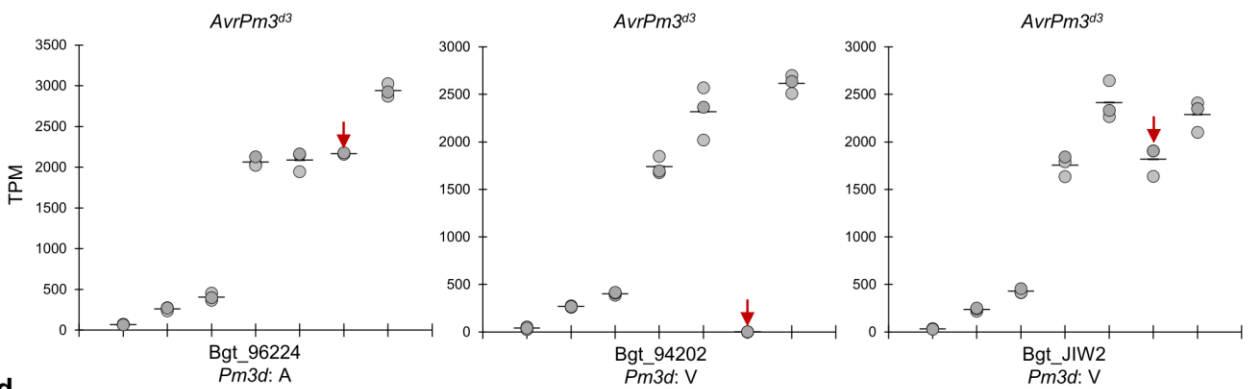

**d**

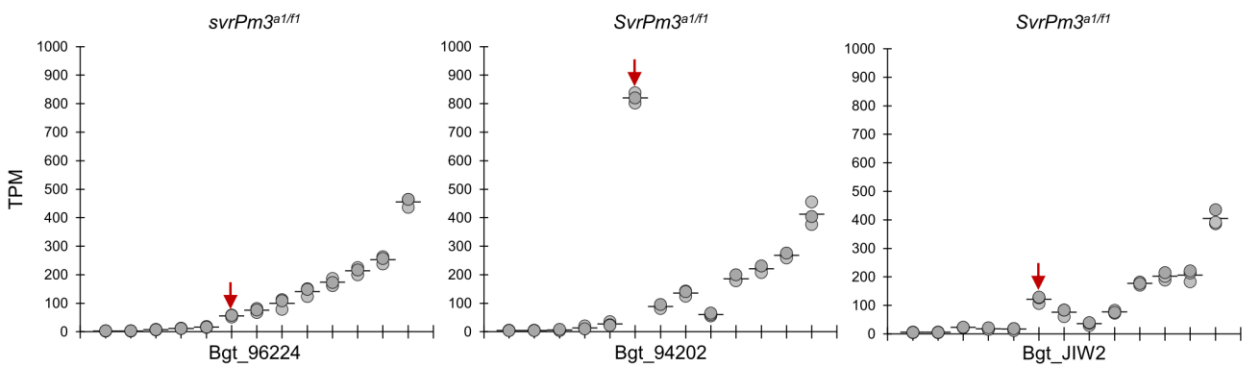

139

140

141 **Supplementary Figure 15.** Gene expression analysis of the *AvrPm3*<sup>a2/f2</sup>, *AvrPm3*<sup>b2/c2</sup>, *AvrPm3*<sup>d3</sup>, and  
142 *SvrPm3*<sup>a1/f1</sup> effector gene families.  
143 RNA-Seq assessment of gene expression levels of the *AvrPm3*<sup>a2/f2</sup> (a), *AvrPm3*<sup>b2/c2</sup> (b), *AvrPm3*<sup>d3</sup> (c), and  
144 *SvrPm3*<sup>a1/f1</sup> (d) effector gene families in the reference *B.g. tritici* isolates Bgt\_96224, \_94202, and \_JIW2  
145 (avirulence (A) and virulence (V) patterns on relevant *Pm3* alleles are given). Every family member is  
146 represented by three vertically aligned dots corresponding to data points originating from three biological  
147 replicates. All members are always depicted in the same order in the three isolates. The position of the  
148 *AvrPm3*<sup>a2/f2</sup>, *AvrPm3*<sup>b2/c2</sup>, *AvrPm3*<sup>d3</sup>, and *SvrPm3*<sup>a1/f1</sup> gene within the plot is indicated with a red arrow. Gene  
149 expression levels are indicated as Transcripts Per Kilobase Million (TPM). The mean TPM expression values  
150 are indicated with a horizontal line. Raw data underlying the reported gene expression levels are provided in a  
151 Source Data File.

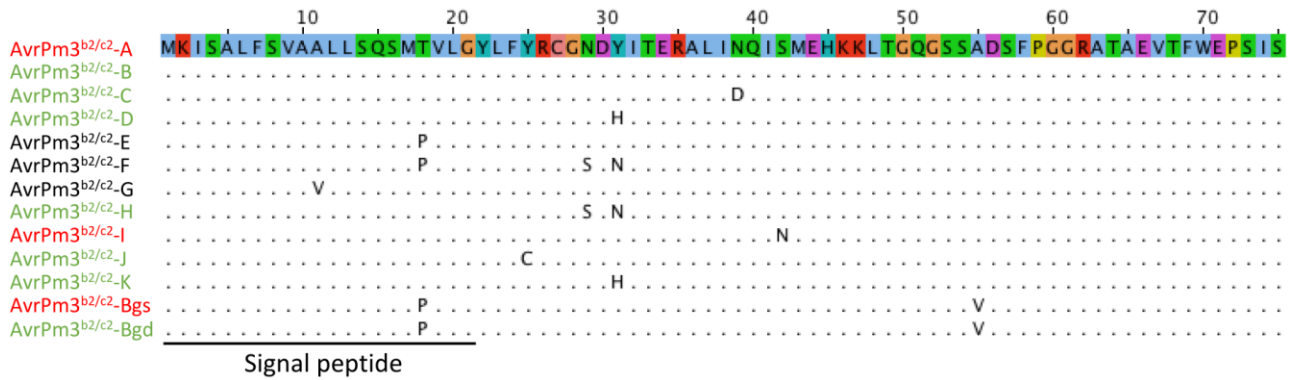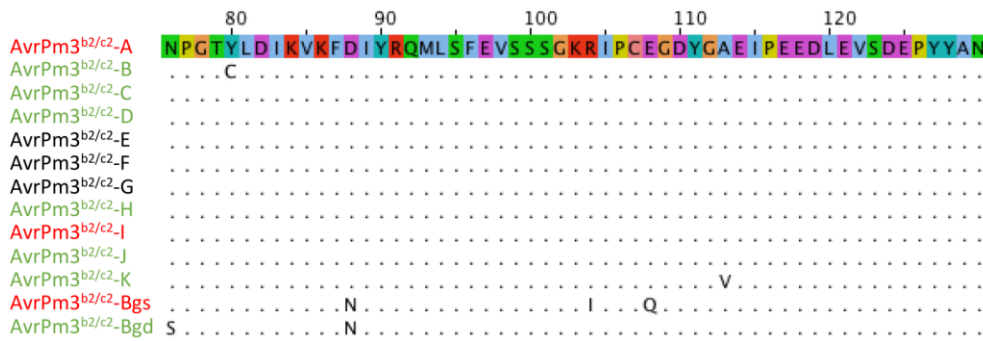

152

153

154 **Supplementary Figure 16.** Sequence alignments of the natural AVRPM3<sup>B2/C2</sup> protein variants.

155 Variants recognized by PM3B, variants not-recognized by PM3B and untested variants are marked in red,  
 156 green and black, respectively. The sequences of AVRPM3<sup>B2/C2</sup>-A from Bgt\_96224 and Bgt\_94202 are shown  
 157 as a reference, for all variants only polymorphic residues are indicated whereas identical residues are  
 158 represented by dots. The extent of the N-terminal predicted signal peptide is highlighted by a black line.  
 159 Coloring of the amino acids is based on biochemical or physical properties (ClustalX color scheme: blue:  
 160 hydrophobic; red: positively charged; purple: negatively charged; green: polar uncharged; yellow: proline;  
 161 pink: cysteine; orange: glycine).

162

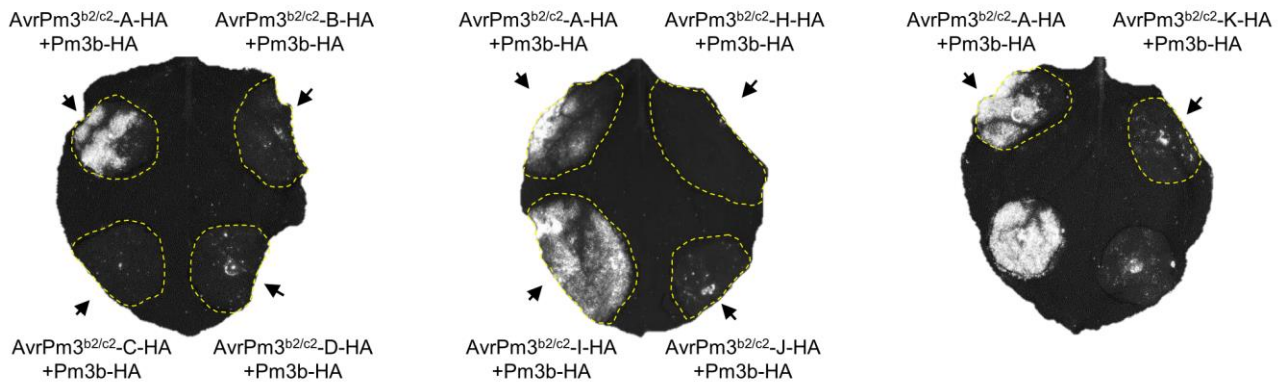

163

164

165 **Supplementary Figure 17.** Assessment of the functionality of tagged AVRPM3<sup>B2/C2</sup> haplotypes

166 Transient co-expression of C terminal HA tag fusion of *AvrPm3*<sup>b2/c2</sup> haplotypes together with *Pm3b*-HA in  
 167 *Nicotiana benthamiana* leaves. Combination of *AvrPm3*<sup>b2/c2</sup>-A-HA and *Pm3b*-HA is used as a control. HR was  
 168 scored using HSR imaging 5 days after leaf agro-infiltration. Results are consistent over at least two  
 169 independent replicates each consisting of at least 6-8 independent leaves.

170

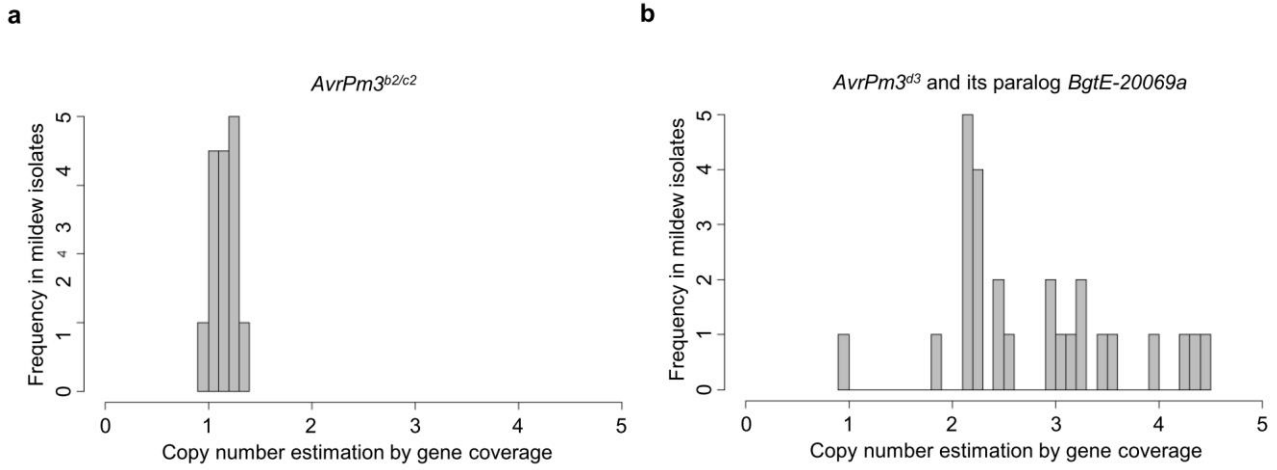

171

172

173 **Supplementary Figure 18.** Copy number variation of *AvrPm3<sup>b2/c2</sup>*, *AvrPm3<sup>d3</sup>*, and *BgtE-20069a* in wheat  
 174 powdery mildew isolates.

175 Copy number variation (CNV) of (a) *AvrPm3<sup>b2/c2</sup>*, and (b) *AvrPm3<sup>d3</sup>* and its orthologue *BgtE-20069a*, in 36  
 176 wheat powdery mildew isolates. CNV estimates were extracted from previous analysis by Muller et al. (2018)<sup>2</sup>  
 177 where all wheat powdery mildew effector gene families were analyzed, and the copy number of every family  
 178 number was estimated. Raw data underlying copy number estimation is provided in a Source Data File.

179

a

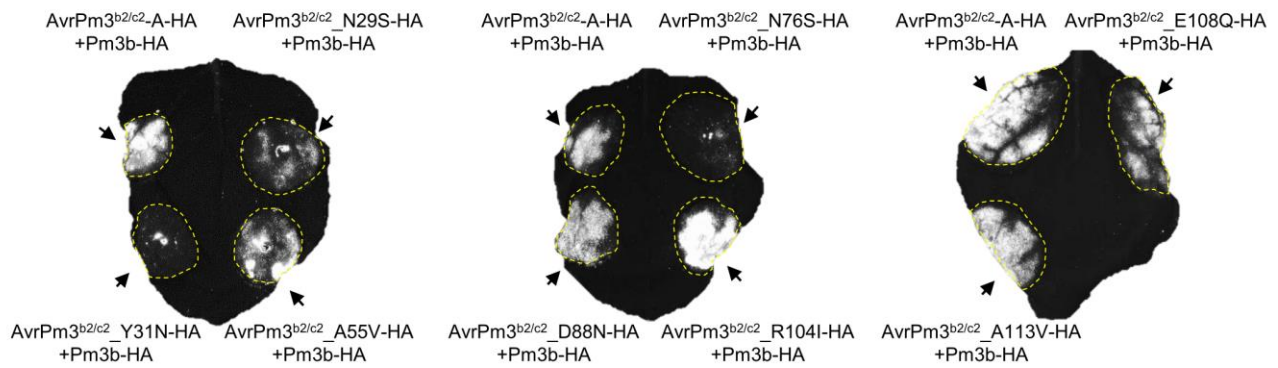

b

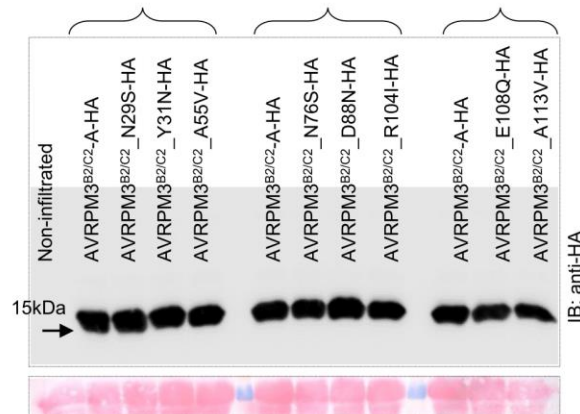

180

181

182 **Supplementary Figure 19.** Assessment of the functionality and protein expression levels of tagged  
183 AVRPM3<sup>B2/C2</sup> point mutants.

184 (a) Transient co-expression of C terminal HA tag fusion of *AvrPm3*<sup>B2/C2</sup> point mutants together with *Pm3b*-HA  
185 in *Nicotiana benthamiana* leaves. Combination of *AvrPm3*<sup>B2/C2</sup>-A-HA and *Pm3b*-HA is used as a control. HR  
186 was scored using HSR imaging 5 days after leaf agro-infiltration. Results are consistent over at least two  
187 independent replicates each consisting of at least 6-8 independent leaves. (b) Western blot detection (upper  
188 panel) of C terminal HA epitope fusion of AVRPM3<sup>B2/C2</sup> point mutants. Ponceau staining of the western blot  
189 membranes is depicted in the lower panel. Braces indicate samples where all constructs were combined on the  
190 same leaf and rotated together with AVRPM3<sup>B2/C2</sup>-A-HA as a reference control. Uncropped Western blot  
191 images are provided in a Source Data File.

192

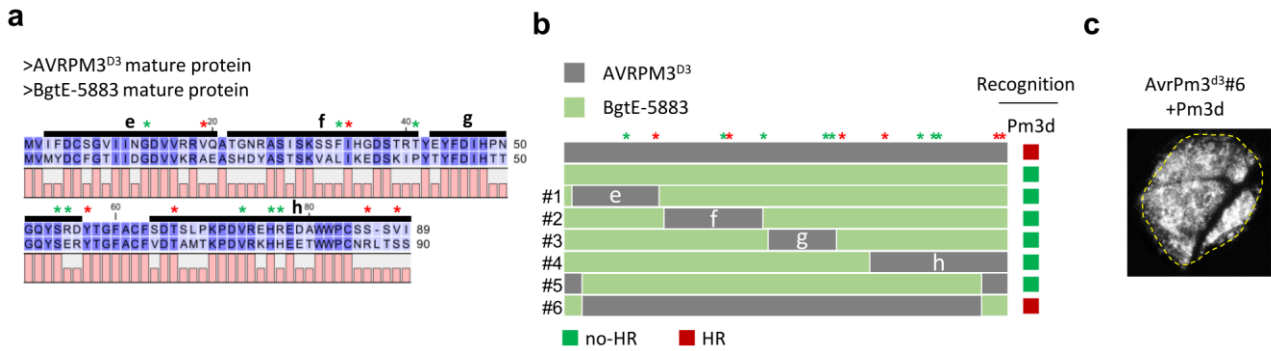

193  
194  
195  
196  
197  
198  
199  
200  
201  
202  
203  
204  
205

**Supplementary Figure 20.** Consequence of synthetic domain swaps on the recognition of AVRPM3<sup>D3</sup>

(a) Protein sequence alignment of the mature peptide of AVRPM3<sup>D3</sup> and the closest family member BgtE-5883. (b) Schematic representation of the protein domains swapped between AVRPM3<sup>D3</sup> (grey) and BgtE-5883 (green). Swapped domains are indicated and labeled e, f, g, and h. (a-b) Position of the residues identified from the natural sequence diversity (Fig. 4e) are indicated with asterisks. The impact of individual residues on AVR recognition is indicated with ‘green’ for mutations with a disruptive effect, and ‘red’ for mutations, with a neutral effect, according to the results summarized in Fig. 4e. (c) Transient expression assays in *N. benthamiana* indicating recognition of the AVRPM3<sup>D3</sup> swap #6 by *Pm3d*. Complete *N. benthamiana* leaf pictures are provided in a Source Data File.



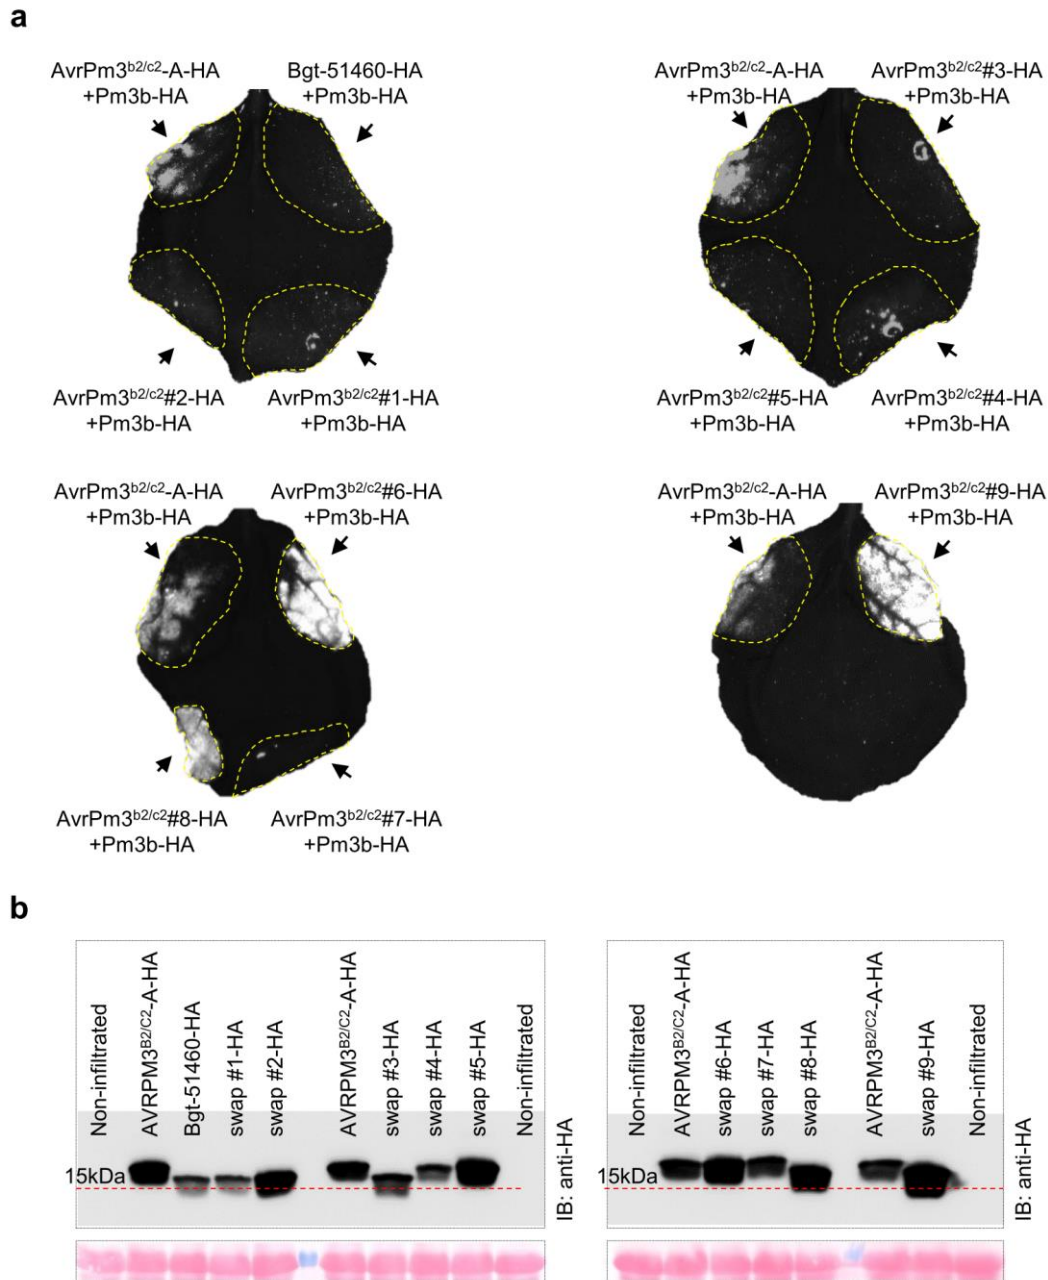

206

207 **Supplementary Figure 21.** Assessment of the functionality and protein expression levels of epitope tagged  
 208 AVRPM3<sup>B2/C2</sup> x BGT-51460 domain swaps.

209 (a) Transient co-expression of C terminal HA tag fusion of *Bgt-51460* and *AvrPm3<sup>b2/c2</sup>* swaps #1 - #9 together  
 210 with Pm3b-HA in *Nicotiana benthamiana* leaves. Combination of *AvrPm3<sup>b2/c2</sup>-A* and *Pm3b-HA* is used as a  
 211 control. HR was scored using HSR imaging 5 days after leaf agro-infiltration. Results are consistent over at  
 212 least two independent replicates of at least 6-8 independent leaves. (b) Western blot detection (upper panel) of  
 213 C terminal HA epitope fusion of AVRPM3<sup>B2/C2</sup>, the closet family member BGT-51460, and swaps #1 to #9  
 214 depicted in Fig. 5b. Ponceau staining of the western blot membranes is depicted in the lower panel. Uncropped  
 215 Western blot images are provided in a Source Data File.

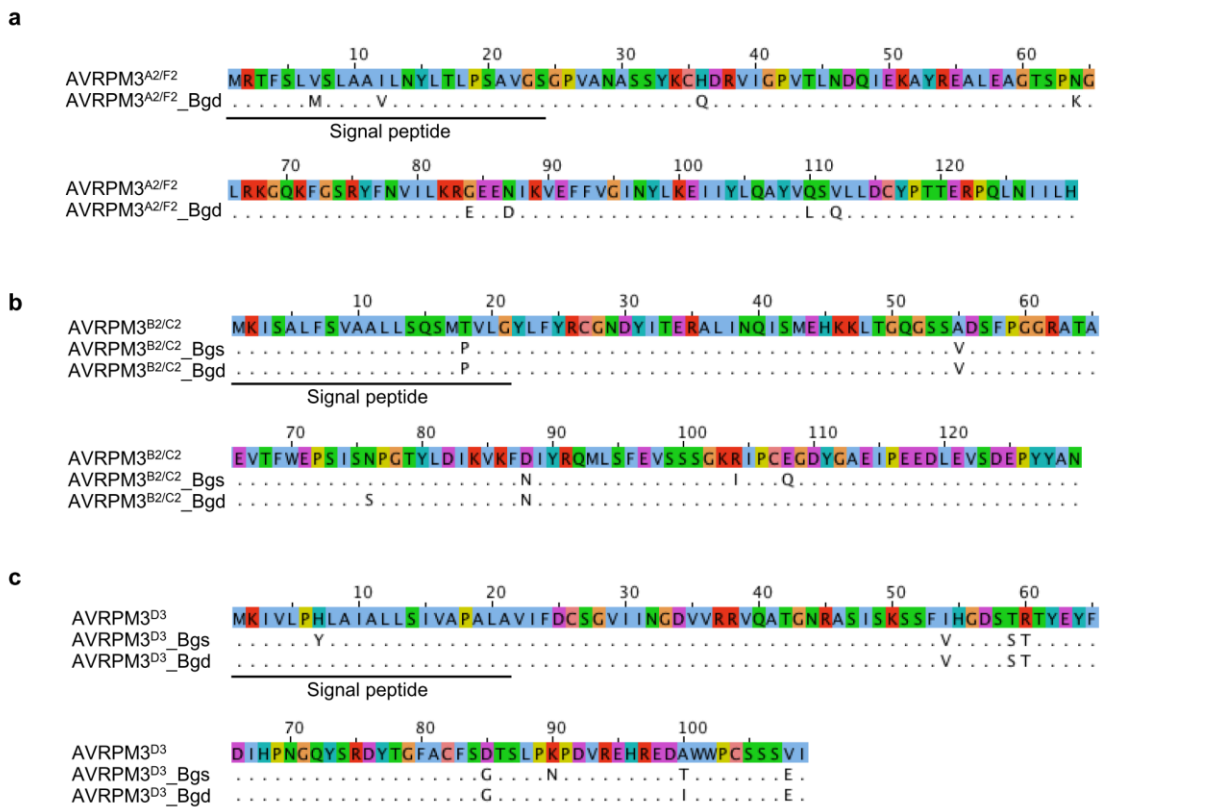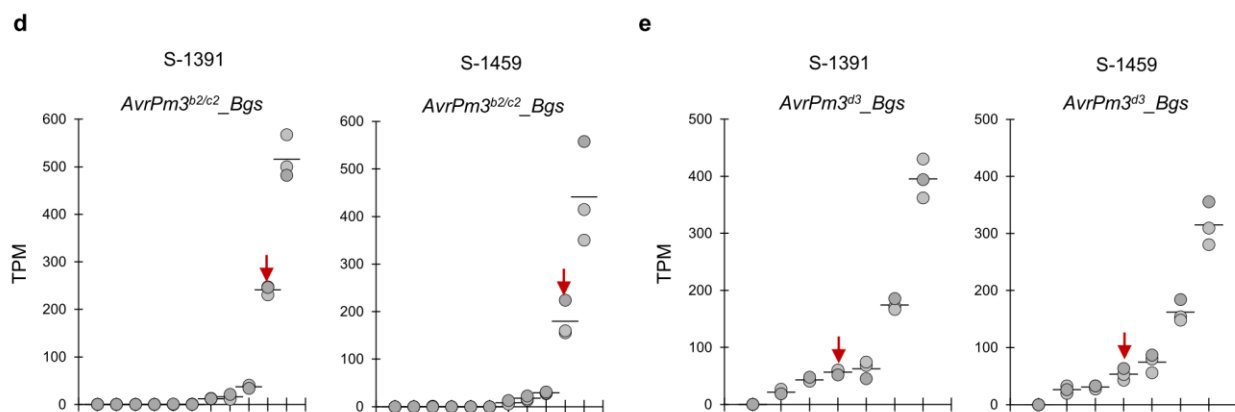

216

217 **Supplementary Figure 22.** Sequence and gene expression analysis of direct *AvrPm3* homologues in rye and  
218 *Dactylis* powdery mildews.

219 **(a-c)** Protein sequence alignment of **(a)** AVRPM3<sup>A2/F2</sup>, **(b)** AVRPM3<sup>B2/C2</sup>, and **(c)** AVRPM3<sup>D3</sup> and homologues  
220 found in rye and *Dactylis* powdery mildew. The sequence of the AVRPM3 proteins from Bgt\_96224 is shown  
221 as a reference. For all homologues only polymorphic residues are indicated whereas identical residues are  
222 represented by dots. The extent of the N-terminal predicted signal peptide is highlighted by a black line.

223 Coloring of the amino acids is based on biochemical or physical properties (ClustalX color scheme: blue:  
224 hydrophobic; red: positively charged; purple: negatively charged; green: polar uncharged; yellow: proline;  
225 pink: cysteine; orange: glycine). **(d-e)** RNA-sequencing assessment of gene expression levels of **(d)**  
226 *AvrPm3*<sup>B2/C2</sup> and **(e)** *AvrPm3*<sup>D3</sup> homologues in the *B. g. secalis* isolates S-1391 and S-1459<sup>4,5</sup>. Every family

227 member is represented by three vertically aligned dots corresponding to data points originating from three  
228 biological replicates. All members are always depicted in the same order in the two isolates. The position of  
229 the *AvrPm3<sup>b2/c2</sup>*, and *AvrPm3<sup>d3</sup>* genes within the plot is indicated with a red arrow. Gene expression levels are  
230 indicated as Transcripts Per Kilobase Million (TPM). The mean TPM expression values are indicated with a  
231 horizontal line. Raw data underlying the reported gene expression levels are provided in a Source Data File.  
232

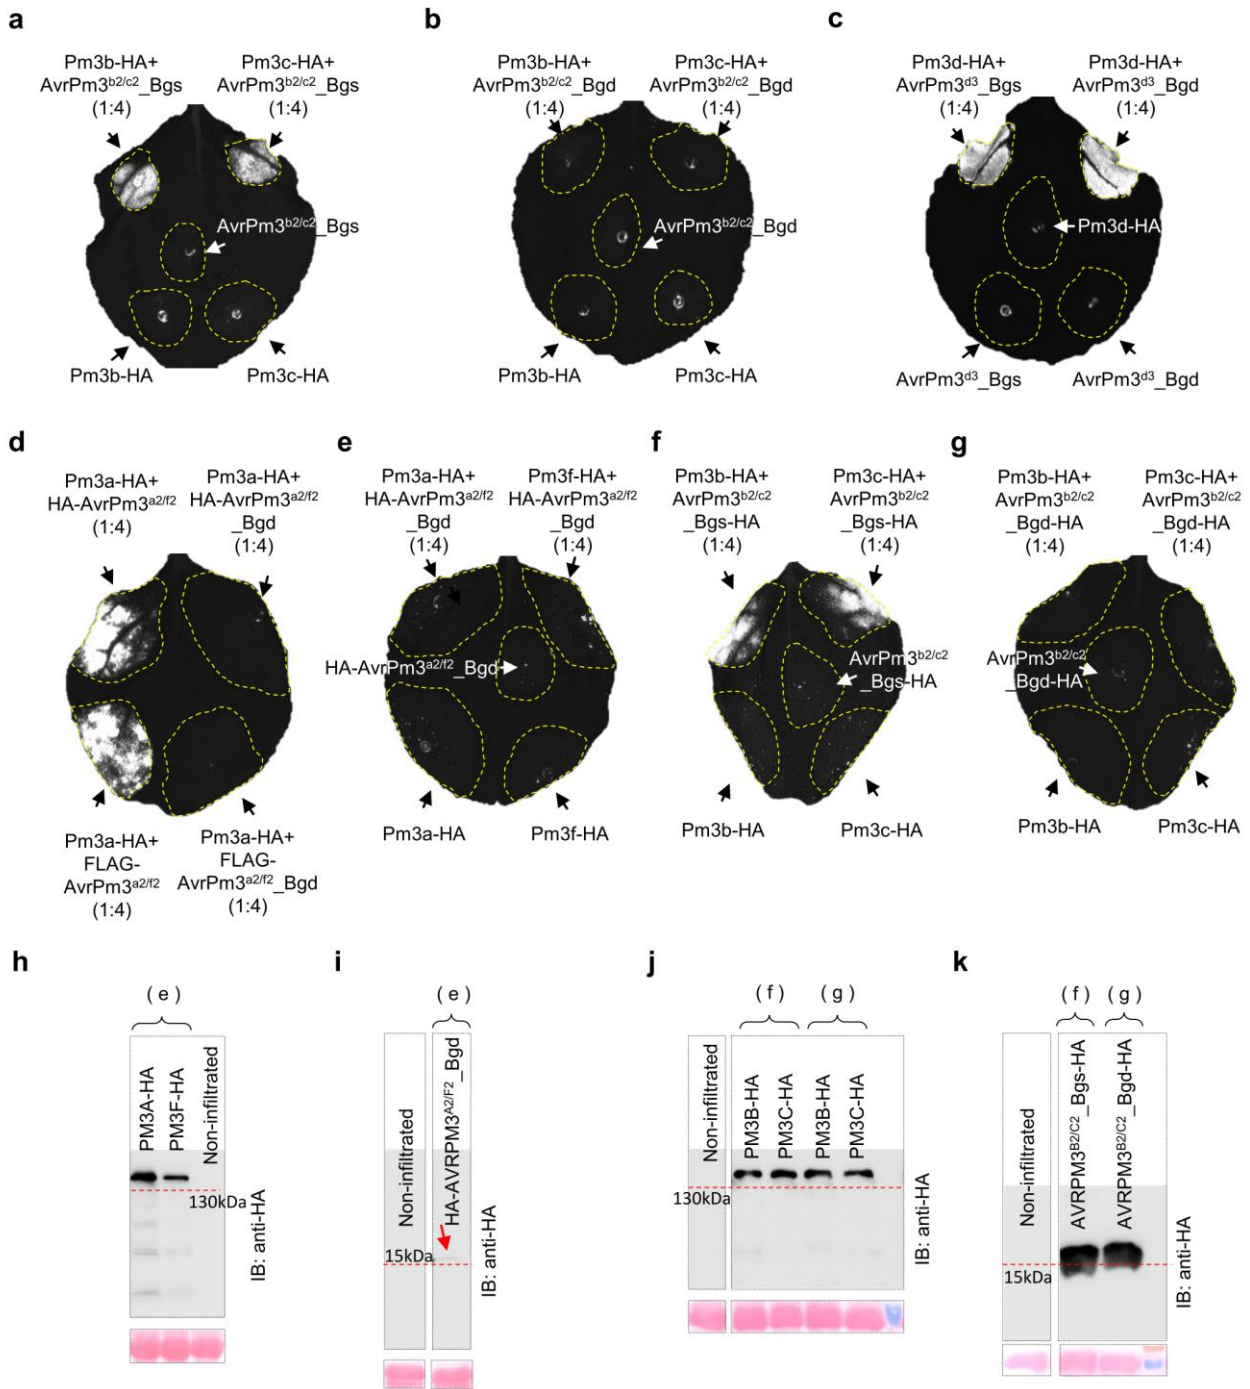

233

234 **Supplementary Figure 23. *AvrPm3<sup>a2/f2</sup>\_Bgd*, *AvrPm3<sup>b2/c2</sup>\_Bgs*, and *AvrPm3<sup>b2/c2</sup>\_Bgd* functional validation,**  
 235 **epitope tagging, and protein expression controls.**

236 **(a-c)** Transient expression controls for functional validation assays of *AvrPm3<sup>b2/c2</sup>\_Bgs* **(a)**, *AvrPm3<sup>b2/c2</sup>\_Bgd*  
 237 **(b)**, *AvrPm3<sup>d3</sup>\_Bgs* and *AvrPm3<sup>d3</sup>\_Bgd* **(c)**. **(d)** Functional assessment of *AvrPm3<sup>a2/f2</sup>\_Bgd* N terminal HA and  
 238 FLAG epitope fusions in transient co-expression assays together with *Pm3a*-HA. *AvrPm3<sup>a2/f2</sup>\_Bgd* is not  
 239 recognized, independently of the epitope tag. **(e)** Functional assessment of HA-*AvrPm3<sup>a2/f2</sup>\_Bgd* in co-  
 240 expression assays together with *Pm3a*-HA and *Pm3f*-HA. HA-*AvrPm3<sup>a2/f2</sup>\_Bgd* is not recognized by *Pm3a*-

241 HA nor *Pm3f*-HA. **(f-g)** Functional assessment of *AvrPm3<sup>b2/c2</sup>\_Bgs*-HA **(f)** and *AvrPm3<sup>b2/c2</sup>\_Bgd*-HA **(g)**  
242 epitope tagged constructs in transient co-expression assays together with *Pm3b*-HA and *Pm3c*-HA. HR was  
243 revealed by HSR imaging and results were consistent across at least two independent assays of at least 8 leaf  
244 replicates. **(h-i)** Protein expression controls for PM3A-HA and PM3F-HA **(h)**, and HA-AVRPM3<sup>A2/F2</sup>\_Bgd **(i)**  
245 from the same setup depicted in (e). Protein expression controls for PM3B-HA and PM3C-HA **(j)**, and  
246 AVRPM3<sup>B2/C2</sup>\_Bgs-HA and AVRPM3<sup>B2/C2</sup>\_Bgd-HA **(k)** from the same setup depicted in (f) and (g),  
247 respectively. Uncropped Western blot images are provided in a Source Data File.  
248  
249

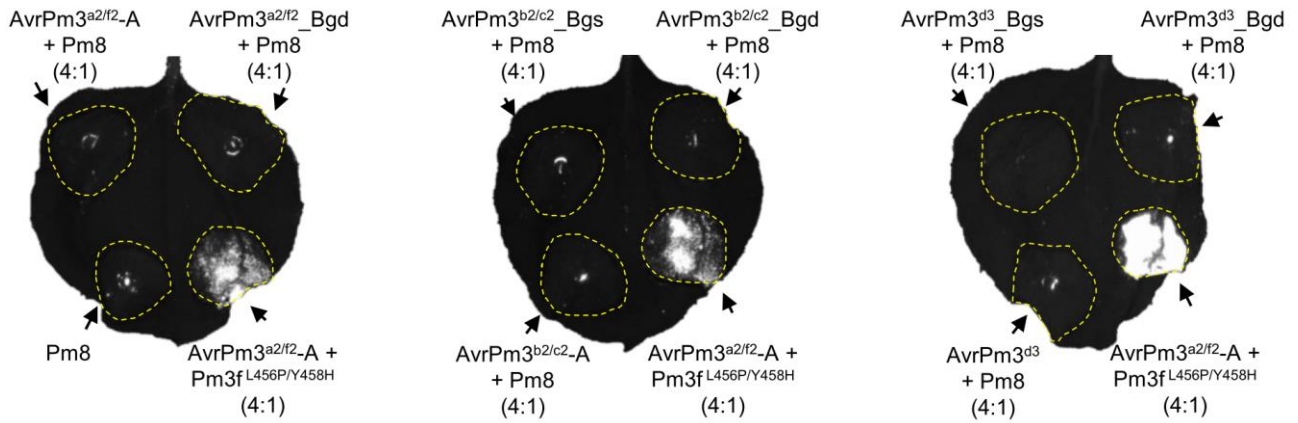

250

251 **Supplementary Figure 24.** Assessment of possible recognition of the *AvrPm3* homologues from rye and  
 252 *Dactylis* powdery by the *Pm8* resistance gene, a *Pm3* orthologue from rye.

253 HR is revealed by HSR imaging 5 days post *Nicotiana benthamiana* agroinfiltration. Co-expression of  
 254 *AvrPm3<sup>a2/f2</sup>-A* and *Pm3f<sup>L456P/Y458H</sup>* is used as control for proper HR induction. Avr:R ratios are indicated.

255 Results are consistent over at least two assays each consisting of 6–8 independent leaf replicates.

256

**a**

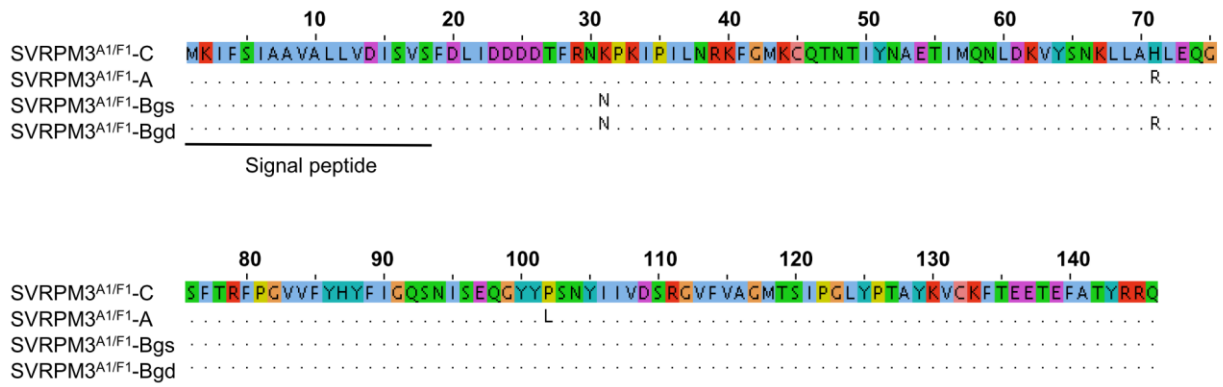

**b**

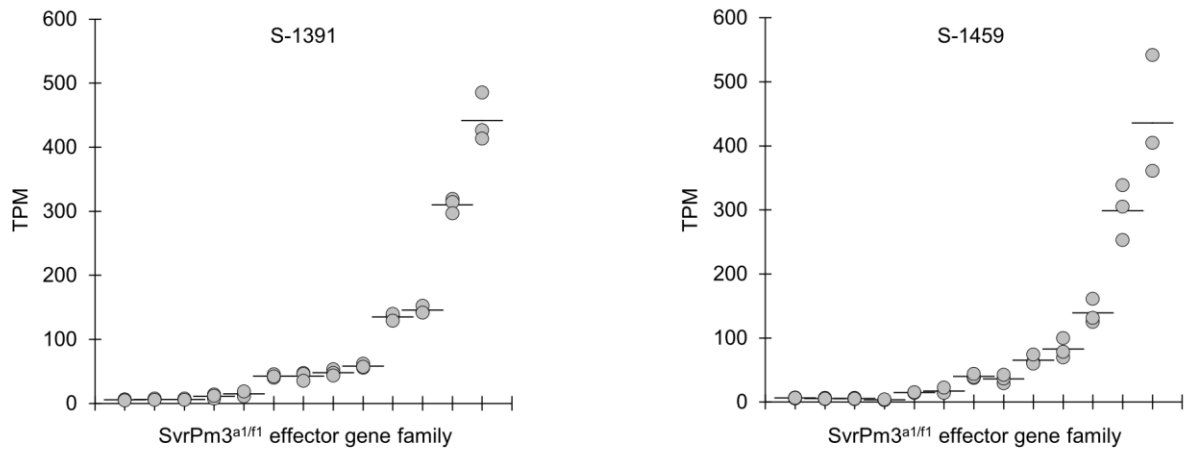

**c**

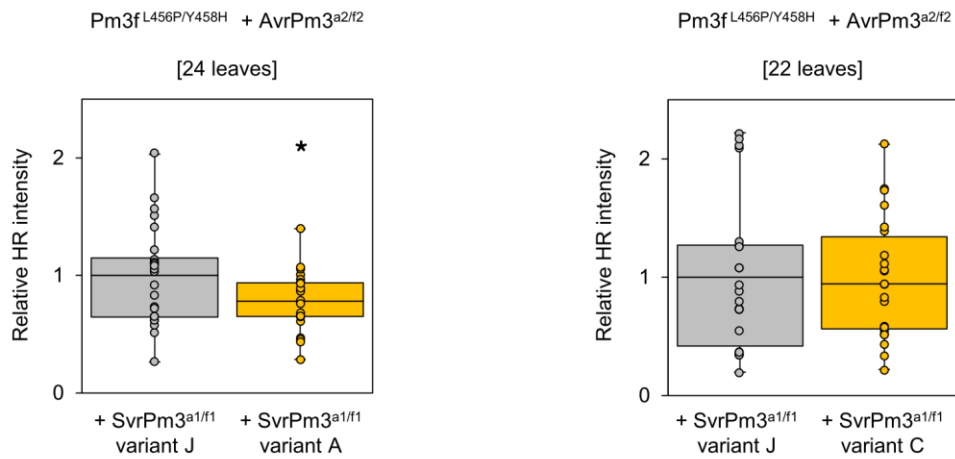

257

258

259 **Supplementary Figure 25.** Characterization of the *SvrPm3<sup>al/f1</sup>-J* variant from rye powdery mildew.  
260 (a) Sequence alignments of SVRPM3<sup>A1/F1</sup> protein variants. The sequence of SVRPM3<sup>A1/F1</sup>-C from Bgt\_96224  
261 (according to McNally et al. 2018<sup>6</sup>) is shown as a reference. For the active suppressor SVRPM3<sup>A1/F1</sup> variant A  
262 from Bgt\_94202 as well as the homologous proteins from *B.g. secalis* (identical to variant J from McNally et  
263 al. 2018<sup>6</sup>), and *B.g. dactylidis*, only polymorphic residues are indicated whereas identical residues are  
264 represented by dots. The extent of the N-terminal predicted signal peptide is indicated by a black line. Coloring  
265 of the amino acids is based on biochemical or physical properties (ClustalX color scheme: blue: hydrophobic;  
266 red: positively charged; purple: negatively charged; green: polar uncharged; yellow: proline; pink: cysteine;  
267 orange: glycine). (b) RNA-sequencing assessment of gene expression levels of the *SvrPm3<sup>al/f1</sup>* family in the  
268 rye powdery mildew isolates S-1391 and S-1459<sup>4,5</sup>. Every family member is represented by three vertically  
269 aligned dots corresponding to data points originating from three biological replicates. All members are always  
270 depicted in the same order in the two isolates. The position of *SvrPm3<sup>al/f1</sup>-J* within the plot is indicated with a  
271 red arrow. Gene expression levels are indicated as Transcripts Per Kilobase Million (TPM). The mean TPM  
272 expression values are indicated with a horizontal line. Raw data underlying the reported gene expression levels  
273 are provided in a Source Data File. (c) Quantification of the HR response in presence of *SvrPm3<sup>al/f1</sup>-J* (the  
274 variant encoded in *B.g. secalis*), compared to the active suppressor *SvrPm3<sup>al/f1</sup>-A* (left panel), and the inactive  
275 suppressor *SvrPm3<sup>al/f1</sup>-C* (right panel). Results demonstrate that *B.g. secalis* encodes an inactive suppressor  
276 comparable to the previously characterized *SvrPm3<sup>al/f1</sup>-C* from wheat powdery mildew. The number of  
277 independent leaf replicates is indicated. Mean values are indicated by the middle line in the boxplot. Individual  
278 data points are plotted along the whiskers delineating minimum and maximum values. Statistical significance  
279 was assessed with a two-sided Student t.Test for paired data and indicated with (\*;  $p < 0.05$ ). Raw data  
280 underlying the reported averages are provided in a Source Data File.



281 **Supplementary Table 1.** Primers used for the amplification of the *AvrPm3*<sup>b2/c2</sup> (*BgtE-20002*) and *AvrPm3*<sup>d3</sup>  
282 (*BgtE-20069b*) haplotype from natural isolates of powdery mildew.

| Primer/Identifier | Sequence (5'-3')           |
|-------------------|----------------------------|
| BgtE-20002-F      | AAGCCGTGAGATCCAAGCTA       |
| BgtE-20002-R      | GTCATTAAGTCATTAGGCCATTCGAC |
| BgtE-20069a/b-F   | CGTCATTTGAAGAGACTTGTG      |
| BgtE-20069a/b-R   | CTAATCTCGACAACCTCTGTTATCG  |

283

284 **Supplementary Table 2.** Primers used for site-directed mutagenesis to produce *BgtE-20069a\_96224*,  
 285 *AvrPm3<sup>Δ3</sup>* (*BgtE-20069b*), *SvrPm3<sup>Δ1/f1</sup>*\_94202 and epitope tagged *AvrPm3* and *SvrPm3* variants

| Primer/Identifier  | Sequence (5'-3')                    |
|--------------------|-------------------------------------|
| BgtE-20069_F53S_F  | GTAAATCCAGCTCTATACACGGAGATTC        |
| BgtE-20069_F53S_R  | TTATACTGGCTCGGTTACCCGT              |
| BgtE-20069_I86T_F  | TTCTGACACAAGCTTGCCAA                |
| BgtE-20069_I86T_R  | AAACAAGCAAAGCCCGTATAGTC             |
| SvrPm3a1/f1_H54R_F | GGTCCTTTACCCGATTC                   |
| SvrPm3a1/f1_H54R_R | CCTGCTCTAGTCTAGCAAGAAG              |
| SvrPm3a1/f1_P85L_F | ATCATCGTGGACTCTCG                   |
| SvrPm3a1/f1_P85L_R | GTAATTGGAAAGGTAGTATCCCTG            |
| AvrPm3a2/f2-HA_F   | GTTCCAGATTACGCTTAAAAGGGTGGGCGC      |
| AvrPm3a2/f2-HA_R   | ATCGTATGGGTAGTGCAAGATAATGTTCAACTGTG |
| AvrPm3a2/f2-FLAG_F | GATGACGACAAGTAAAAGGGTGGGCGC         |
| AvrPm3a2/f2-FLAG_R | GTCTTTGTAGTCGTGCAAGATAATGTTCAACTGTG |
| HA-AvrPm3a2/f2_F   | GTTCCAGATTACGCTGGTCCGTGTCGCAAATGCTA |
| HA-AvrPm3a2/f2_R   | ATCGTATGGGTACATGGTGAAGGGGGC         |
| FLAG-AvrPm3a2/f2_F | GATGACGACAAGGTCTGTCGCAAATGCTA       |
| FLAG-AvrPm3a2/f2_R | GTCTTTGTAGTCCATGGTGAAGGGGGC         |
| AvrPm3b2/c2-HA_F   | GTTCCAGATTACGCTTAGAAGGGTGGGCGC      |
| AvrPm3b2/c2-HA_R   | ATCGTATGGGTAGTTAGCATAATAAGGCTCGTCTG |
| AvrPm3b2/c2-FLAG_F | GATGACGACAAGTAGAAGGGTGGGCGC         |
| AvrPm3b2/c2-FLAG_R | GTCTTTGTAGTCGTTAGCATAATAAGGCTCGTCTG |
| HA-AvrPm3b2/c2_F   | GTTCCAGATTACGCTTATTTGTTTTACCGATGCGG |
| HA-AvrPm3b2/c2_R   | ATCGTATGGGTACATGGTGAAGGGGGC         |
| FLAG-AvrPm3b2/c2_F | GATGACGACAAGTATTTGTTTTACCGATGCGG    |
| FLAG-AvrPm3b2/c2_R | GTCTTTGTAGTCCATGGTGAAGGGGGC         |
| AvrPm3d3-HA_F      | GTTCCAGATTACGCTTGAAAGGGTGGGCGC      |
| AvrPm3d3-HA_R      | ATCGTATGGGTAGATGACACTTGAAGTGCACG    |
| AvrPm3d3-FLAG_F    | GATGACGACAAGTGAAGGGTGGGCGC          |
| AvrPm3d3-FLAG_R    | GTCTTTGTAGTCGATGACACTTGAAGTGCACG    |
| HA-AvrPm3d3_F      | GTTCCAGATTACGCTGTGATCTTCGATTGCTCAGG |
| HA-AvrPm3d3_R      | ATCGTATGGGTACATGGTGAAGGGGGC         |
| FLAG-AvrPm3d3_F    | GATGACGACAAGGTGATCTTCGATTGCTCAGG    |
| FLAG-AvrPm3d3_R    | GTCTTTGTAGTCCATGGTGAAGGGGGC         |
| SvrPm3a1/f1-HA_F   | GTTCCAGATTACGCTTAGAAGGGTGGGCGC      |
| SvrPm3a1/f1-HA_R   | ATCGTATGGGTACTGCCGCTATAGTTGC        |
| SvrPm3a1/f1-FLAG_F | GATGACGACAAGTAGAAGGGTGGGCGC         |
| SvrPm3a1/f1-FLAG_R | GTCTTTGTAGTCCTGCCGCTATAGTTGC        |
| HA-SvrPm3a1/f1_F   | GTTCCAGATTACGCTTTCGACCTCATTGACGATG  |
| HA-SvrPm3a1/f1_R   | ATCGTATGGGTACATGGTGAAGGGGGC         |
| FLAG-SvrPm3a1/f1_F | GATGACGACAAGTTCGACCTCATTGACGATG     |
| FLAG-SvrPm3a1/f1_R | GTCTTTGTAGTCCATGGTGAAGGGGGC         |

286

287 **Supplementary Table 3.** Primers used to amplify genetic marker regions in *Locus\_3*.

| Primer/Identifier | Sequence (5'-3')         |
|-------------------|--------------------------|
| Ctg118_21_F       | TCCACTTCACCGAATACGTGATCT |
| Ctg118_21_R       | CAAGGCAATCGCTACCACTACT   |
| Sc667_3_F         | GCATCGCTTCTTGTACTTGTATTT |
| Sc667_3_R         | AACAGATACTAGAAATCGCAATCG |
| Ctg118_18_F       | ACCGGGATTGAATGTTCCCTG    |
| Ctg118_18_R       | TTGAGCCTGCTGTTGGACAT     |
| Ctg118_14_F       | GACAGCTGGTTTCCCTGTCC     |
| Ctg118_14_R       | GTGGTTACGGCCACCTTTA      |
| Ctg49_2_F         | GGATGGTGTGGTTGGCTATC     |
| Ctg49_2_R         | GGCAGAGGACGAGAGTGAGA     |

288

289 **Supplementary Note 1.** Effector benchmarking procedure.

290 The effector benchmarking approach was developed to reduce the large number of known candidate effector  
291 genes (595 at the time of analysis) to a manageable number for experimental analysis. It is based on the  
292 hypothesis that effector genes encoding for avirulence proteins are likely to share similar features in terms of  
293 sequence properties and gene expression levels. We therefore implemented a benchmarking scheme to identify  
294 powdery mildew effectors that resemble the functionally validated avirulence genes *AvrPm3<sup>a2/f2</sup>*, *AvrPm2* from  
295 *B.g. tritici*<sup>1,7</sup> and *Avra1*, *Avra13* from *B.g. hordei*<sup>8</sup>.

296  
297 We classified the features defining a putative candidate *Avr* effector into four groups: “1.1 Sequence  
298 polymorphism” between the Bgt\_96224 reference isolate (avirulent on all *Pm3* alleles) and the isolates  
299 Bgt\_94202 (virulent on all *Pm3* alleles) and Bgt\_JIW2 (virulent on *Pm3c* and *Pm3f* only), “1.2 Protein  
300 structure”, “2.1 Absolute expression” in the reference isolate Bgt\_96224, and 2.2 “Differential expression”  
301 between Bgt\_96224 and the phenotypically contrasting isolates Bgt\_94202 and Bgt\_JIW2 (Supplementary  
302 Data 1). For each category, we defined a scoring scheme based on the assumption that Bgt\_96224, which is  
303 avirulent on all the *Pm3* alleles, should encode for all *AvrPm3* specificities. Therefore, putative effectors best  
304 fulfilling the criteria for an *Avr* in the Bgt\_96224 isolate can be considered as possible *AvrPm3* genes. For each  
305 of the described 4 categories, we defined a series of criteria each of which describes specific features of an  
306 expected *Avr*. For example, in the category “1.2 Protein structure” we defined 10 (code 121-130 in  
307 Supplementary Data 1) criteria assessing the features of each mildew effector in terms of presence of a signal  
308 peptide, the number of cysteines, and the size of the native peptide (i.e. including the signal peptide)  
309 (Supplementary Data 1). Each criterion was given a weight so that for example a putative effector encoding a  
310 protein within the size range of the previously identified AVRs (defined as 115-135 aa) would receive a higher  
311 score than those encoding for much bigger or much small peptides (e.g. < 70 aa, or >300 aa). To determine the  
312 appropriate weight each criterion should receive, we manually tested several scoring schemes and  
313 progressively adapted the weights so that the functionally validated *Avrs* would score among the top 20 best  
314 candidates (i.e. serving as positive control for proper *Avr* identification). After each round we assessed to what  
315 extent the subset of the top 100 candidates was enriched in effectors simultaneously combining the best criteria  
316 for protein size, expression level, and sequence polymorphism as depicted in Supplementary Figure 1. The  
317 whole benchmarking procedure was executed based on the powdery mildew genome annotation and RNA-Seq  
318 data described in previous work by Praz and colleagues<sup>5</sup>.

319  
320 All candidates were manually re-annotated, and a subset of 16 effectors was applied to molecular validation  
321 of mRNA structure by RACE-PCR (Supplementary Data 4). We excluded members of the *AvrPm3<sup>a2/f2</sup>* family  
322 that had been already tested at the time we designed the assay<sup>1,6</sup>. Subsequently, the top 100 candidates were  
323 codon optimized for expression in *N. benthamiana*, and cloned by gene synthesis (Supplementary Data 3).  
324 This approach led to the identification *AvrPm3<sup>b2/c2</sup>*, and *AvrPm3<sup>d3</sup>* thus demonstrating that effector

325 benchmarking is indeed a rapid and effective alternative to *Avr* identification by classical map-based cloning  
326 or GWAS. However, while effector benchmarking demonstrates several advantages compared to GWAS and  
327 map-based cloning, one major limitation is that it can only be used if the candidate genes have well defined  
328 features. Also, the effectiveness of effector benchmarking is highly dependent on the quality of the genome  
329 annotation, since it is based on the comparison of well annotated effectors. We therefore propose that this  
330 approach is complementary to- and builds on classical genetics approaches, and it can be adapted to other plant  
331 pathogenic fungi based on specific features of avirulence genes in those systems.

332 **Supplementary Note 2.** Annotation of the *AvrPm3<sup>b2/c2</sup>* genetic locus.  
333 The position of the *AvrPm3<sup>b2</sup>* GWAS peak was located within the genetic interval previously identified as the  
334 genetic *Locus\_3* which controls specificity towards *Pm3b* and *Pm3c*<sup>1</sup>. In an initial effort to map the *AvrPm3c*  
335 gene in a genetic cross between the mildew isolates Bgt\_96224 and Bgt\_JIW2 segregating for *Pm3c*<sup>9</sup>, two  
336 flanking markers M049LE and ctg118\_21, were identified (Supplementary Figure 2). Here we took advantage  
337 of the Bacterial Artificial Chromosome (BAC) clone library which was assembled for the reference isolates  
338 Bgt\_96224 as another source for uncovering the full sequence of *Locus\_3*<sup>10</sup>. The BAC clones were previously  
339 assembled into Finger Printed Contigs (FPC) thus allowing the identification of 6 overlapping BAC clones  
340 covering the physical region defined by *Locus\_3* (Supplementary Figure 2). We used the same approach  
341 previously described by Bourras and colleagues<sup>1</sup> to validate the physical overlap between the BACs which  
342 has resulted in the selection of five clones (7i16, 28j03, 7p01, 29k04, and 4k17) for sequencing (Supplementary  
343 Figure 2)  
344  
345 We combined different resources to thoroughly annotate this genetically complex locus as follows: (i) we used  
346 the high quality PacBio sequence annotation of the locus, derived from the reference isolate Bgt\_96224<sup>11</sup>, (ii)  
347 we assembled the sequences of the 5 BAC clones from the same Bgt\_96224 reference isolate, spanning the  
348 whole region covering the flanking genetic markers (Supplementary Figure 2), (iii) we used RNA-Seq data  
349 from the Bgt\_96224 reference (avirulent on *Pm3b* and *Pm3c*) to manually curate and thoroughly annotate  
350 genes and transposable elements, and (iv) we used RNAseq and genome re-sequencing data from the  
351 Bgt\_94202 isolate (virulent on *Pm3b* and *Pm3c*) to identify sequence polymorphisms, locus rearrangements,  
352 and differential expression patterns that can be associated with the phenotype. This has resulted in a very-high  
353 quality sequence annotation of *Locus\_3*, including the identification of novel effector sequences.  
354

355 **Supplementary Note 3.** Epitope tagging of AVR and SVR proteins.  
356 HA and FLAG epitope tags were added N and C-terminally to the mature peptide encoded by *AvrPm3*<sup>a2/f2</sup>,  
357 *AvrPm3*<sup>b2/c2</sup>, *AvrPm3*<sup>d3</sup> and *SvrPm3*<sup>a1/f1</sup> using site-directed mutagenesis (SDM). All constructs were  
358 recombined into the pIPKb004 expression vector and mobilized by electroporation into the *Agrobacterium*  
359 *tumefaciens* strain GV3101 as previously described<sup>1,12</sup>. Protein detection assays upon transient expression in  
360 *N. benthamiana* (see methods), revealed all 4 effectors had significantly different levels of tag tolerance  
361 including: not detectable (AVRPM3<sup>D3</sup>), detectable in N terminal fusions only (AVRPM3<sup>A2/F2</sup>), detectable in  
362 C terminal fusions only (AVRPM3<sup>B2/C2</sup>) (Fig. 2a-c), and detectable in N and C terminal fusions (SVRPM3<sup>A1/F1</sup>)  
363 (Fig. 3d). For AVRPM3<sup>D3</sup> no protein could be detected independently of tag position or sequence, despite  
364 several attempts optimizing western blotting procedure, using different ODs of *Agrobacteria* (0.5-1.5) and  
365 different time-points of extraction (1-4dpi). Altogether, this data suggest that epitope fusions can have severe  
366 negative effects on AVRPM3 protein expression and stability, suggesting these effectors are highly sensitive  
367 to structural modifications. Finally, SVRPM3<sup>A1/F1</sup> stands out in these assays as all attempted fusions resulted  
368 in the detection of high amounts of protein. This would suggest that SVRPM3<sup>A1/F1</sup> is a structurally more stable  
369 effector protein as compared to the AVRPM3s.  
370

371 **Supplementary Note 4.** Specificity of AVR recognition and NLR-NLR interactions among the *Pm3* alleles.  
372 Compared to other well-described allelic series of resistance genes such as *RPP13*, the *L* and the *Mla* series  
373 from Arabidopsis, flax and barley, respectively, the *Pm3* alleles stand out with their high level of similarity  
374 (>97%) on the protein level<sup>13-16</sup>. An extreme case is exemplified by PM3D and PM3E that only differ by two  
375 amino acids in the LRR domain but recognize distinctly different spectra of mildew races<sup>17</sup>. Furthermore,  
376 PM3D and PM3E only differ from the PM3CS susceptible allele by respectively 3 and 2 residues in the LRR  
377 domain, yet they are among the strongest alleles in the field<sup>17,18</sup>. Interestingly, neither AVRPM3<sup>D3</sup>, nor its  
378 recognized homologues from *B.g. secalis* or *B.g. dactylidis* are recognized by PM3E or PM3CS. Similarly, in  
379 the fungus, the duplicated paralog of *AvrPm3<sup>d3</sup>* (*BgtE-20069a*) found in the genome of Bgt\_96224 and  
380 Bgt\_94202, encodes a protein that only differs from the active AVR by 2 and 3 amino acid polymorphisms,  
381 respectively. Taken together these observations indicate that specificity of AVR recognition by the PM3  
382 variants is highly sensitive to single amino acid changes on both sides of the interaction.

383  
384 Evidence of inter-allelic suppression among the *Pm3* variants was initially reported from several genetic  
385 crosses between near-isogenic *Pm3* lines<sup>12</sup>. In one case this observation was molecularly validated in transient  
386 co-expression assays in *N. benthamiana*<sup>1,12</sup> where it was shown that *Pm3b* was able to suppress the HR induced  
387 by an auto-active variant of *Pm3f*<sup>12</sup>, and also the HR induced by the natural *Pm3a* and *Pm3f* alleles upon  
388 recognition of *AvrPm3<sup>a2/f2</sup>*<sup>1</sup>. Here, we tested the suppression spectra of all *Pm3* alleles and the *Pm3CS* ancestral  
389 sequence, in presence of the newly identified *AvrPm3* genes (*AvrPm3<sup>b2/c2</sup>*, and *AvrPm3<sup>d3</sup>*), and taking full  
390 advantage of our improved experimental setup (i.e. use of codon optimized *Avr* constructs, and HR  
391 visualization using the HSR imaging technology).

392  
393 We assayed the suppression activity for *Pm3a*, *Pm3b*, *Pm3c*, *Pm3d*, *Pm3e*, *Pm3f* and *Pm3CS*, in transient co-  
394 expression assays when every allele was combined with *AvrPm3<sup>a2/f2</sup>-Pm3a*, *AvrPm3<sup>a2/f2</sup>-Pm3f*, *AvrPm3<sup>b2/c2</sup>-*  
395 *Pm3b*, *AvrPm3<sup>b2/c2</sup>-Pm3c*, and *AvrPm3<sup>d3</sup>-Pm3d*. The resulting HR was compared to a control where the  
396 putative NLR suppressor was replaced by GUS at equal ratios, similar to the experimental set-up previously  
397 described by Bourras and colleagues<sup>1</sup>. We found that *Pm3a* and *Pm3f* had no suppression activity towards  
398 *Pm3b*, *Pm3c*, or *Pm3d* (Supplementary Figure 8). The *Pm3b/c* alleles had the broadest suppression spectrum  
399 and were able to suppress recognition of *AvrPm3<sup>a2/f2</sup>* and *AvrPm3<sup>d3</sup>* by *Pm3a/f* and *Pm3d*, respectively  
400 (Supplementary Figure 9a-b). *Pm3d* was able to suppress recognition of *AvrPm3<sup>b2/c2</sup>* by *Pm3b/c*, but  
401 interestingly *Pm3d* only suppressed the recognition of *AvrPm3<sup>a2/f2</sup>* by the weaker *Pm3f* allele (Supplementary  
402 Figure 9c). Similarly, *Pm3e* was able to suppress *AvrPm3<sup>a2/f2</sup>* and *AvrPm3<sup>b2/c2</sup>* only when combined with the  
403 weaker *Pm3f* and *Pm3c* alleles, respectively (Supplementary Figure 9d). We also assayed the inter-allelic  
404 suppression spectrum of the *Pm3CS* ancestral susceptible allele, using the same NLR-NLR suppression assay.  
405 We found that *Pm3CS* was capable to suppress *Pm3a*, *Pm3f*, and *Pm3b* (Supplementary Figure 9e), but not  
406 *Pm3c* and *Pm3d*. Interestingly PM3C and PM3D are identical to PM3CS in the CC-NB-ARC domain (CC:



407 coiled-coil, NB: nucleotide-binding, ARC: APAF-1 “apoptotic protease-activating factor-1”, R proteins and  
408 CED-4 “Caenorhabditis elegans death-4 protein”), while all three NLRs suppressed by PM3CS (i.e. PM3A,  
409 PM3F, and PM3B) have divergent CC-NB-ARC sequences (Figure 6a-c, lower panel).

410

411 To summarize, these assays show that *Pm3a/f* have no NLR suppression activity and are mostly suppressed by  
412 the other *Pm3* alleles. *Pm3e* is only active on the weaker *Pm3c* and *Pm3f* alleles, while *Pm3b/c* and *Pm3d* have  
413 reciprocal suppression capacity and act as the strongest suppressors among the functional *Pm3* NLRs. These  
414 results indicate that NLR mediated suppression of the *AvrPm3-Pm3* interactions is *Pm3* allele specific and  
415 independent of the cognate *Avr* sequence, and we hypothesize this can be mediated by the formation of NLR  
416 heterodimers or multimers inhibiting *R* gene activation or proper AVR recognition.

417 **Supplementary Note 5.** Gene expression analysis of the *AvrPm3<sup>a2/f2</sup>*, *AvrPm3<sup>b2/c2</sup>*, *AvrPm3<sup>d3</sup>*, and *SvrPm3<sup>a1/f1</sup>*  
418 effector gene families.

419 We took advantage of the availability of the highly improved wheat powdery mildew genome sequence <sup>11</sup>,  
420 with an updated definition of the effector gene families, to assess relative gene expression levels of the three  
421 *AvrPm3* genes and the *SvrPm3<sup>a1/f1</sup>* suppressor within their respective gene families. We used the RNA-Seq  
422 data previously produced by Praz and colleagues <sup>5</sup>, the new mildew PacBio derived mildew genome <sup>11</sup>, and  
423 the RNA-Seq analysis software “Salmon” <sup>19</sup>, to assess for gene expression levels at 2dpi in the three reference  
424 isolates Bgt\_96224, \_94202, and \_JIW2.

425  
426 We found that the active *AvrPm3<sup>a2/f2</sup>* allele encoded by Bgt\_96224, and \_JIW2 (Supplementary Figure 15a),  
427 the active *AvrPm3<sup>b2/c2</sup>* allele encoded by all three isolates (Supplementary Figure 15b), as well as the active  
428 *AvrPm3<sup>d3</sup>* allele encoded by Bgt\_96224 and \_JIW2 (Supplementary Figure 15c), were always among the most  
429 highly expressed members of their effector gene families. The data also suggests there is an association  
430 between the expression levels of the active *SvrPm3<sup>a1/f1</sup>* suppressor encoded by Bgt\_94202 and \_JIW2  
431 (Supplementary Figure 15d), and virulence of these two isolates on *Pm3b/c* and *Pm3d*. In particular, low  
432 expression levels of the active *SvrPm3<sup>a1/f1</sup>* suppressor in \_JIW2 seem to be sufficient for suppressing *Avr*  
433 recognition by the weak *Pm3f* and *Pm3c* alleles but not by the strong *Pm3a* and *Pm3b* alleles or *Pm3d*. These  
434 results suggest that the *AvrPm3* effectors are important virulence factors and that *SvrPm3<sup>a1/f1</sup>* might play an  
435 important role in maintaining effector function while suppressing effector recognition.

436

437 **Supplementary Note 6.** Consequence of synthetic domain swaps on the recognition of AVRPM3<sup>B2/C2</sup> and  
438 AVRPM3<sup>D3</sup>.

439

440 Based on the functional data from the genetic diversity screens suggesting the presence of specific domains  
441 involved in R protein recognition, we wanted to study a possible structural basis for the specificity of the  
442 AVRPM3<sup>B2/C2</sup>-PM3B and AVRPM3<sup>D3</sup>-PM3D interactions. Therefore, we designed domain swaps between  
443 AVRPM3<sup>B2/C2</sup> and AVRPM3<sup>D3</sup> and the most closely related member of their effector families, BGT-51460  
444 and BGTE-5883, respectively. We did so by exchanging regions of approximately 20 amino acids, flanked by  
445 conserved residues, between the AVR and its non-recognized partner (Fig. 5a, Supplementary Figure 21a).  
446 Care was taken that regions with high levels of natural diversity (Figure 5b, Supplementary Figure 21b) would  
447 be located entirely within one exchanged segment. We postulate that structural conservation among close  
448 family members will allow the replacement of protein subdomains while preserving AVR protein structure.  
449 This should reveal which parts of the protein are involved in recognition.

450

451 We designed eight swaps between AVRPM3<sup>B2/C2</sup> and BGT-51460 all of which were codon optimized for *N.*  
452 *benthamiana*, cloned without signal peptide by gene synthesis and tested for recognition by PM3B and PM3C.  
453 In constructs #1-4 we replaced a defined region of BGT-51460 by its counterpart from AVRPM3<sup>B2/C2</sup> whereas  
454 for constructs #5-8 the opposite strategy was used (Fig. 5b). Interestingly none of the defined regions of  
455 AVRPM3<sup>B2/C2</sup> introduced into BGT-51460 conferred recognition by PM3B or PM3C on its own (swaps#1-4,  
456 Fig. 5b). Consistent with these findings, the two regions (segments a and c) harboring naturally occurring SNPs  
457 with a disruptive effect on *R*-gene recognition could not be replaced by BGT-51460 sequences without loss of  
458 recognition (swap#5 & #7, Fig. 5b). In contrast, one region of AVRPM3<sup>B2/C2</sup> (segment 'b') with low genetic  
459 diversity among natural isolates could be replaced without negative impact on *R*-gene recognition, and resulted  
460 in a stronger HR response (swap#6, Fig. 5c). Similarly, replacement of segment 'd' from AVRPM3<sup>B2/C2</sup> by its  
461 counterpart from BGT-51460 in swap#8 resulted in significantly stronger *Avr* recognition by *Pm3b* and *Pm3c*  
462 (swap#8, Fig. 5d). Finally, while individual replacement of segments 'a' and 'c' from BGT-51460 with their  
463 counterpart from AVRPM3<sup>B2/C2</sup> had no impact on recognition (swap#1 and #3), a stronger HR was observed  
464 with swap#9 where these segments were simultaneously exchanged (Fig. 5e). This data demonstrates that  
465 regions 'a' and 'c', are necessary and sufficient to confer AVR function, and together with regions 'b' and  
466 'd' they can additionally affect the strength of NLR-AVR recognition. Taken together these findings imply that  
467 AVRPM3<sup>B2/C2</sup> recognition is dependent on two regions that correspond to sequences previously defined by the  
468 natural diversity screens, plus two regions possibly corresponding to a structurally conserved region in the  
469 AVRPM3<sup>B2/C2</sup> family.

470

471 For AVRPM3<sup>D3</sup> and its paralog BGTE-20069A we observed a more uniform distribution of disruptive SNPs  
472 in natural diversity screens covering the complete central part of the AVR protein between the Y/FxC motif

473 and the conserved C-terminal cysteine (Figure 4c). We designed four swaps between AVRPM3<sup>D3</sup> and BGTE-  
474 5883 covering different stretches of polymorphic residues (#1-4 Supplementary Figure 21a-b) and two  
475 additional ones in which only N- and C- terminal ends of AVRPM3<sup>D3</sup>, consisting of two and six polymorphic  
476 residues, were replaced by sequences from BGTE-5883 and vice versa (#5-6 Supplementary Figure 21a-b).  
477 Similar to the findings from AVRPM3<sup>B2/C2</sup> none of the defined subdomains of AVRPM3<sup>D3</sup> was sufficient to  
478 confer recognition by PM3D on its own (#1-5, Supplementary Figure 21b), whereas construct #6, containing  
479 the complete central part of AVRPM3<sup>D3</sup> resulted in strong HR when combined with the R-protein, indicating  
480 that recognition is independent of the C- and N-terminal regions of the AVR (Supplementary Figure 21c)

481

482 To summarize, these experiments indicate structural conservation between AVRPM3<sup>B2/C2</sup> and the closest  
483 effector family member since several subdomains can be readily exchanged without loss of recognition.  
484 Furthermore, our data implies that multiple protein surface regions are involved in the interaction with the  
485 corresponding R-proteins and that information from natural diversity screens can be used to define such  
486 regions. This further supports the hypothesis that overall protein structure as well as specific contact regions  
487 are important for recognition.

488 **Supplementary Note 7.** Evidence for the role of *Avr-R* interactions as determinants of host-specificity in  
489 cereal mildews.

490

491 The role of *Avr-R* interactions in host specificity was originally investigated using genetic crosses between  
492 cereal mildews in a seminal work published over 20 years ago by Matsumura and Tosa<sup>23</sup>. Based on genetic  
493 analysis of phenotypic segregation patterns in a cross between two isolates of wheat and rye powdery mildew,  
494 the authors provided genetic evidence that the rye mildew isolate Sk-1 carries *AvrPm1*, *AvrPm2*, *AvrPm3a*,  
495 *AvrPm3b*, *AvrPm3c*, and *AvrPm4a*. In a recent study by Praz and colleagues<sup>7</sup> a functional *AvrPm2* from rye  
496 mildew was indeed isolated and functionally validated for recognition by the *Pm2* resistance gene. In another  
497 study by Praz and colleagues<sup>5</sup>, a comparative transcriptomic approach was used to study gene expression  
498 patterns in triticale powdery mildew, a new *forma specialis* that is a hybrid of wheat and rye mildews<sup>4</sup>. The  
499 authors suggested that altered expression of multiple effector genes, in particular *Avr* and *Svr* related factors,  
500 might play a role in mildew host adaptation based on hybridization<sup>5</sup>.

501

502 In this study we had a unique opportunity to probe Matsumura and Tosa's predictions at the molecular level  
503 in the *Pm3* allelic series of NLRs. We aimed at investigating the role of the *Pm3* alleles as a determinant of  
504 host specificity to *B.g. secalis* and *B.g. dactylidis*, two mildew *formae speciales* specifically growing on rye  
505 (*Secale cereale*) and *Dactylis glomerata*. Rye is a wide spread cereal crop and a member of the *Triticeae* tribe,  
506 while *Dactylis* is a wild grass and a distant *Poaceae* relative from the *Dactylidinae* tribe<sup>24,25</sup>. *B.g. secalis* has  
507 diverged from *B.g. tritici* within the *tritici* clade, while *B.g. dactylis* has very likely emerged after a host jump  
508 from the *tritici* clade to *Dactylis*<sup>4</sup>. On the host side, the functional diversity of *Pm3* alleles has emerged after  
509 the formation of hexaploid wheat, and all alleles have very likely diversified from *Pm3CS*, a non-functional  
510 ancestral sequence<sup>26</sup>. In this context, it is likely that the *Pm3* alleles have co-evolved along host specialization  
511 of *B.g. tritici* to the newly evolved hexaploid bread wheat to recognize important effectors for mildew  
512 virulence. In such case, conservation of the *Avr* function of these effectors in other *formae speciales* would  
513 demonstrate that the *Pm3* alleles can also act as a barrier to non-adapted mildew forms. Based on the  
514 conservation of *Avr* function of these effectors from other *formae speciales* we therefore hypothesized that the  
515 *Pm3* alleles, can also act as host-specificity determinants against non-adapted mildew forms, in addition to  
516 their role in race-specific resistance to adapted wheat mildew isolates.

517

518 To test this hypothesis, we made use of two sets of *Pm3* wheat lines. First, *Pm3b* and *Pm3d* transgenic lines in  
519 the background of the 'Bobwhite' cultivar, previously shown to confer strong race-specific resistance towards  
520 *B.g. tritici* both under laboratory conditions and in the field<sup>27,28</sup>. Second, the near-isogenic wheat lines 'Chul'  
521 backcrossed 8 times in Chancellor (Chul<sup>8xCC</sup>, a *Pm3b* NIL), and Sonora<sup>8xCC</sup> (a *Pm3c* NIL) that have been used  
522 to identify the genetic loci associated with avirulence towards *Pm3b* and *Pm3c* in *B.g. tritici*<sup>1,9</sup> (this study).  
523 We challenged the *Pm3* wheat lines and corresponding susceptible controls 'Bobwhite' and 'Chancellor' with

524 two different *B.g. secalis* isolates, S-1391 and S-1459, for which we have RNA-seq data showing that the  
525 *AvrPm3<sup>b2/c2</sup>* and *AvrPm3<sup>d3</sup>* homologues encoded in these non-adapted pathogens are expressed (Supplementary  
526 Figure 26b). The ability of the rye isolates to infect the non-host wheat was assessed microscopically, at an  
527 early stage of the infection (48 hours), where compatible isolates can usually form a haustorium and a few  
528 secondary hyphae (hereafter referred to as “microcolony”). We used two different staining methods (see  
529 Methods) to distinguish the following phenotypic categories: (i) microcolony formation in the absence of  
530 hypersensitive cell-death, indicating successful host-penetration at an early stages of infection reminiscent of  
531 an infection from an adapted mildew, and (ii) arrest of spore growth in the presence or absence of a detectable  
532 hypersensitive cell-death, reminiscent of a race-specific resistance response. In agreement with our hypothesis  
533 that *Pm3b*, *Pm3c* and *Pm3d* contribute to non-host resistance to non-adapted *formae speciales*, the rate of  
534 microcolony formation of both tested *B.g. secalis* isolates was significantly ( $p < 0.05$ ), and consistently reduced  
535 on the transgenic and near-isogenic *Pm3* wheat lines when compared to the susceptible controls ‘Bobwhite’  
536 and ‘Chancellor’ (Figure 6d-e). We conclude that these assays further demonstrate that the *Pm3* alleles are  
537 potent host-specificity determinants, as predicted by Matsumura and Tosa two decades ago<sup>23</sup>.  
538

539 **References**

- 540 1. Bourras, S. *et al.* Multiple Avirulence Loci and Allele-Specific Effector Recognition Control the Pm3  
541 Race-Specific Resistance of Wheat to Powdery Mildew. *Plant Cell* **27**, 2991–3012 (2015).
- 542 2. Müller, M. C. *et al.* A chromosome-scale genome assembly reveals a highly dynamic effector  
543 repertoire of wheat powdery mildew. *New Phytol.* (2018). doi:DOI:10.1111/nph.15529
- 544 3. Zimmermann, L. *et al.* A Completely Reimplemented MPI Bioinformatics Toolkit with a New  
545 HHpred Server at its Core. *J. Mol. Biol.* (2018). doi:10.1016/j.jmb.2017.12.007
- 546 4. Menardo, F. *et al.* Hybridization of powdery mildew strains gives rise to pathogens on novel  
547 agricultural crop species. *Nat. Genet.* **48**, 201–205 (2016).
- 548 5. Praz, C. R. *et al.* Non-parent of Origin Expression of Numerous Effector Genes Indicates a Role of  
549 Gene Regulation in Host Adaption of the Hybrid Triticale Powdery Mildew Pathogen. *Front. Plant*  
550 *Sci.* **9**, 49 (2018).
- 551 6. McNally, K. E. *et al.* Distinct domains of the AVRPM3A2/F2 avirulence protein from wheat  
552 powdery mildew are involved in immune receptor recognition and putative effector function. *New*  
553 *Phytol.* (2018). doi:10.1111/nph.15026
- 554 7. Praz, C. R. *et al.* AvrPm2 encodes an RNase-like avirulence effector which is conserved in the two  
555 different specialized forms of wheat and rye powdery mildew fungus. *New Phytol.* **213**, 1301–1314  
556 (2017).
- 557 8. Lu, X. *et al.* Allelic barley MLA immune receptors recognize sequence-unrelated avirulence effectors  
558 of the powdery mildew pathogen. *Proc. Natl. Acad. Sci.* **113**, E6486–E6495 (2016).
- 559 9. Parlange, F. *et al.* Genetic and molecular characterization of a locus involved in avirulence of  
560 *Blumeria graminis* f. sp. *tritici* on wheat Pm3 resistance alleles. *Fungal Genet. Biol.* **82**, 181–92  
561 (2015).
- 562 10. Wicker, T. *et al.* The wheat powdery mildew genome shows the unique evolution of an obligate  
563 biotroph. *Nat. Genet.* **45**, 1092–1096 (2013).
- 564 11. Müller, M. C. *et al.* A chromosome-scale assembly of the wheat powdery mildew genome provides  
565 insight into origin and evolution of genes associated with host-pathogen interactions. *Submitted*  
566 (2018).
- 567 12. Stirnweis, D. *et al.* Suppression among alleles encoding nucleotide-binding-leucine-rich repeat  
568 resistance proteins interferes with resistance in F1 hybrid and allele-pyramided wheat plants. *Plant J.*  
569 **79**, 893–903 (2014).
- 570 13. Rose, L. E. *et al.* The Maintenance of Extreme Amino Acid Diversity at the Disease Resistance Gene,  
571 RPP13, in *Arabidopsis thaliana*. *Genetics* **166**, 1517–1527 (2004).
- 572 14. Ravensdale, M., Nemri, A., Thrall, P. H., Ellis, J. G. & Dodds, P. N. Co-evolutionary interactions  
573 between host resistance and pathogen effector genes in flax rust disease. *Molecular Plant Pathology*  
574 **12**, 93–102 (2011).

- 575 15. Seeholzer, S. *et al.* Diversity at the Mla powdery mildew resistance locus from cultivated barley  
576 reveals sites of positive selection. *Mol. Plant-Microbe Interact.* **23**, 497–509 (2010).
- 577 16. Bhullar, N. K., Mackay, M. & Keller, B. Genetic diversity of the Pm3 powdery mildew resistance  
578 alleles in wheat gene bank accessions as assessed by molecular markers. *Diversity* **2**, 768–786 (2010).
- 579 17. Brunner, S. *et al.* Intragenic allele pyramiding combines different specificities of wheat Pm3  
580 resistance alleles. *Plant J.* **64**, 433–445 (2010).
- 581 18. Koller, T., Brunner, S., Herren, G., Hurni, S. & Keller, B. Pyramiding of transgenic Pm3 alleles in  
582 wheat results in improved powdery mildew resistance in the field. *Theor. Appl. Genet.* **131**, 861–871  
583 (2018).
- 584 19. Patro, R., Duggal, G., Love, M. I., Irizarry, R. A. & Kingsford, C. Salmon provides fast and bias-  
585 aware quantification of transcript expression. *Nat. Methods* **14**, 417–419 (2017).
- 586 20. Thomas, W. J., Thireault, C. A., Kimbrel, J. A. & Chang, J. H. Recombineering and stable integration  
587 of the *Pseudomonas syringae* pv. *syringae* 61 hrp/hrc cluster into the genome of the soil bacterium  
588 *Pseudomonas fluorescens* Pf0-1. *Plant J.* **60**, 919–928 (2009).
- 589 21. Kim, M. G., Geng, X., Lee, S. Y. & Mackey, D. The *Pseudomonas syringae* type III effector  
590 AvrRpm1 induces significant defenses by activating the Arabidopsis nucleotide-binding leucine-rich  
591 repeat protein RPS2. *Plant J.* (2009). doi:10.1111/j.1365-313X.2008.03716.x
- 592 22. Liu, C. *et al.* The stripe rust fungal effector PEC6 suppresses pattern-triggered immunity in a host  
593 species-independent manner and interacts with adenosine kinases. *New Phytologist* (2016).  
594 doi:10.1111/nph.14034
- 595 23. Matsumura, K. & Tosa, Y. The Rye Mildew Fungus Carries Avirulence Genes Corresponding to  
596 Wheat Genes for Resistance to Races of the Wheat Mildew Fungus. *Phytopathology* **85**, 753 (1995).
- 597 24. Soreng, R. J. *et al.* A worldwide phylogenetic classification of the Poaceae (Gramineae); A  
598 worldwide phylogenetic classification of the Poaceae (Gramineae). *J. Syst. Evol.* **53**, 117–137 (2015).
- 599 25. Soreng, R. J. *et al.* A worldwide phylogenetic classification of the Poaceae (Gramineae) II: An update  
600 and a comparison of two 2015 classifications. *Journal of Systematics and Evolution* **55**, 259–290  
601 (2017).
- 602 26. Krattinger, S. G. & Keller, B. Molecular genetics and evolution of disease resistance in cereals. *New*  
603 *Phytol.* **212**, 320–332 (2016).
- 604 27. Brunner, S. *et al.* Transgenic Pm3b wheat lines show resistance to powdery mildew in the field. *Plant*  
605 *Biotechnol. J.* (2011). doi:10.1111/j.1467-7652.2011.00603.x
- 606 28. Brunner, S. *et al.* Transgenic Pm3 multilines of wheat show increased powdery mildew resistance in  
607 the field. *Plant Biotechnol. J.* (2012). doi:10.1111/j.1467-7652.2011.00670.x
- 608
